# Supplementary material for: Cross-Sectional Gene-Smoking Interaction Analysis in Relation to Subclinical Atherosclerosis-Results From the IMPROVE Study
Source: PubMed Central journal article supplement — Circ Genom Precis Med. 2023 Apr 6;16(3):236–47. doi: 10.1161/CIRCGEN.122.003710 (PMC10284137; doi:10.1161/circgen.122.003710), 2023-04-06
Supplement: hcg-16-236-s001.pdf [file hcg-16-236-s001.pdf]

## Supplemental Material

### Content:

|                                     |         |
|-------------------------------------|---------|
| Supplemental Material:              | page 2  |
| Supplemental Tables I-VI:           | page 5  |
| Members of the IMPROVE study group: | page 35 |

## Materials and Methods

### Study population

The IMPROVE study is an observational, multi-center, longitudinal study. In brief, participants (N=3,711), aged from 55 to 79 years, with at least three established vascular risk factors (male sex or at least 5 years after menopause for women, smoking, hypertension, diabetes, dyslipidemia, or family history of cardiovascular disease), but asymptomatic for cardiovascular diseases were recruited from 7 centers in 5 European countries: Finland (n=1,050, recruited in two centers in Kuopio), Sweden (n=533, recruited in Stockholm), the Netherlands (n=532, recruited in Groningen), France (n=501, recruited in Paris), and Italy (n=553, recruited in Milan and n=542 in Perugia). The recruitment took place between March 2004 and April 2005. The study was designed to investigate whether C-IMT independently predicts vascular events in a high-risk European population. The IMPROVE data include information about lifestyle, medical history, socioeconomic status, and biochemical measurements from blood samples <sup>14,76</sup>.

### C-IMT assessment

C-IMT were measured through B-mode ultrasound in different segments of the carotid artery tree. Details of the procedure including precision and validity of the method are reported elsewhere <sup>14</sup>. For the present study, we employed the composite measure of C-IMT corresponding to the maximum of the values measured at the different locations of the whole carotid tree (C-IMT<sub>max</sub>). The reason for choosing C-IMT<sub>max</sub> (among other C-IMT measurements available), is it was associated with current smoking <sup>14</sup> and risk of future manifest CVD <sup>77</sup> in previous studies performed on this study material. Further, it is a commonly used measure in this field. Our chosen methodology for analyzing interactions requires the use of a binary variable for the outcome considered <sup>78</sup>. Hence, C-IMT was dichotomized; we used the cut-point value at the 75<sup>th</sup> percentile of the C-IMT<sub>max</sub> to define abnormal C-IMT in accordance with recommendations from the American Society of Echocardiography <sup>79</sup>. In additional analyses, we also used the 50% cut-point value of C-IMT<sub>max</sub> as it means a broader definition of abnormal C-IMT.

### Smoking assessment

We classified participants in 2 groups: “current smokers’ and “non-smokers” according

to the information reported by the participants at baseline. “Current smokers” included participants who reported current smoking or having smoked regularly in the past but quitting within 2 years of their enrolment. “Non-smokers” included participants who reported that they never had smoked. A total of 495 participants had missing information on smoking status.

#### Genotype data

From the DNA extracted from stored blood samples, genetic information was measured using Illumina Cardio-Metabo- 200k<sup>80</sup> and Immuno- Chips<sup>81</sup> bead array at one of the participating centers (Karolinska Institutet). Standard quality control (QC) procedures were applied for the separate chips as well as for their combination. All individuals were genotyped with both chips and when variants were present on both chips, the QC results were cross-checked. Due to QC, we excluded single nucleotide polymorphisms (SNPs) for any of the following: low call rate, (<95%), low minor allele frequency (MAF<0.05), and deviation from Hardy-Weinberg equilibrium ( $p < 1 \times 10^{-6}$ ). Also, we excluded participants with low call rates (<95%), relatedness, discrepancy between sex chromosome and registered sex, and participants with an outlier value in the multi-dimensional scaling used to explore population stratification<sup>82</sup>.

#### Statistical analysis

For descriptive purposes, categorical variables were reported as percentages, whereas continuous variables were reported as mean values with standard deviations (SD).

For the gene-smoking interactions analysis, we defined interaction as departure from additivity of effects from each of the two factors (smoking and genetic risk variant) considered, consistent with how Rothman defined interaction<sup>83</sup>. A dominant model of inheritance was chosen for the classification of risk genotypes; individuals who carry either one or two copies of the risk allele are considered to carry the risk variant. Using logistic regression, odds ratios (OR) with 95% confidence intervals (CI) of having C-IMT above the 75<sup>th</sup> percentile value (and above the 50<sup>th</sup> percentile value as supplementary analyses) were calculated for: 1) double exposure: smoking and carrying the genetic risk variant (OR11), 2) smoking without carrying the genetic risk

variant (OR01) and 3) carrying the genetic risk variant without being a smoker (OR10). The reference category was the group with neither of the two exposures. These three ORs formed the basis for the calculation of the Synergy index (S), a measure used to evaluate interaction on the additive scale, as follows:  $S = (OR11-1) / (OR10-1) + (OR01-1)$  <sup>78,83</sup>. The 95% CI and p-value for S were calculated using Hosmer and Lemeshow's delta method <sup>84</sup>. Adjustments were made for age, sex, education, physical inactivity, Mediterranean diet score <sup>85</sup>, and population stratification. The GEIRA software code (SAS version), which incorporated SAS procedures for logistic regression analysis and for calculations of the Synergy index, was used for these analyses <sup>86</sup>. The GEIRA software procedure classified the risk variant based on a comparison of MAF between those having abnormal C-IMT (cases) and those without (controls); if the MAF in the cases was greater than or equal to that in controls, the minor allele in the cases was assigned the risk allele, otherwise the major allele. This approach, i.e. that we determine the reference group based on MAF in the cases in comparison with the controls, means that all OR point estimates we obtain are above 1.0 <sup>86</sup>. For main analyses, we chose to only consider results based on data where the minimum number of individuals for each of the possible exposure combinations was at least 10. That pre-defined cut-off was arbitrarily chosen. However, we also performed interaction analyses on the remaining data available. We also tested interactions on the multiplicative scale using the cross-product between smoking and each SNPs considered, assessing its p-value for significance. To address the multiple testing problem, we used the Bonferroni correction: p-values of  $<2.4 \times 10^{-7}$  for S and for cross-product terms were considered significant (0.05 alpha test/207,586 SNPs).

Upon obtaining a significant result, a manual search was performed in the Single Nucleotide Polymorphism database (dbSNP), included in the National Center for Biotechnology Information (NCBI), to determine which gene can be linked to the SNP in question.

Statistical analysis was performed using SAS 9.4 (SAS institute, Cary NC, USA).

Supplemental Table I: Synergy index (S) point estimates with 95% confidence intervals (CI) for the significant gene-smoking interaction results\* after Bonferroni adjustment for multiple testing in relation to C-IMT<sub>max</sub> with cut-off at the 75<sup>th</sup> percentile

|              | <b>S (95% CI)</b> |
|--------------|-------------------|
| <b>Chr 1</b> |                   |
| rs12134420   | 5.39 (1.33;21.83) |
| rs2446622    | 4.89 (1.60;14.94) |
| rs72676073   | 3.69 (1.45;9.38)  |
| rs73009101   | 3.87 (1.35;11.07) |
| <b>Chr 2</b> |                   |
| rs6758414    | 4.63 (1.45;14.82) |
| rs9789490    | 5.82 (1.50;22.59) |
| <b>Chr 3</b> |                   |
| rs9877192    | 4.44 (1.37;14.41) |
| <b>Chr 4</b> |                   |
| rs11736632   | 3.47 (1.34;9.01)  |
| <b>Chr 5</b> |                   |
| rs13176964   | 3.32 (1.34;8.27)  |
| rs2278392    | 4.11 (1.34;12.63) |
| rs4867490    | 4.12 (1.46;11.66) |
| rs7722352    | 4.06 (1.36;12.12) |
| <b>Chr 7</b> |                   |
| rs28695838   | 5.63 (1.86;17.04) |
| <b>Chr 8</b> |                   |
| rs12545167   | 4.52 (1.38;14.81) |
| rs4301463    | 4.08 (1.51;11.02) |
| rs6997802    | 4.06 (1.50;10.95) |
| rs752039     | 5.26 (1.40;19.74) |
| <b>Chr 9</b> |                   |
| rs10810371   | 3.34 (1.35;8.25)  |
| rs143207461  | 4.36 (1.48;12.80) |

Chr 10

rs12244483 4.05 (1.39;11.80)  
rs12251673 4.11 (1.32;12.75)  
rs7068194 4.10 (1.32;12.69)  
rs7092757 4.21 (1.38;12.85)  
rs72826094 5.44 (1.33;22.31)

Chr 11

rs1002171 3.73 (1.33;10.46)  
rs2434468 4.19 (1.46;12.01)  
rs2511241 4.68 (1.65;13.30)  
rs3741392 4.29 (1.42;12.97)  
rs61899280 4.63 (1.58;13.60)

Chr 12

rs10506726 4.96 (1.78;13.80)  
rs11171745 3.64 (1.33;9.94)  
rs11171773 3.84 (1.34;11.02)  
rs116378618 3.88 (1.34;11.23)  
rs1689512 3.64 (1.33;9.94)  
rs17118317 3.95 (1.34;11.64)  
rs35436573 4.09 (1.42;11.77)  
rs4762693 4.57 (1.31;15.91)  
rs773643 3.72 (1.37;10.10)  
rs7956913 4.16 (1.39;12.42)

Chr 13

rs12872592 4.63 (1.51;14.20)

Chr 14

rs4981312 4.60 (1.37;15.48)  
rs7155978 4.00 (1.37;11.72)  
rs915064 4.13 (1.35;12.66)

Chr 16

rs1003341 5.07 (1.27;20.22)

Chr 17

rs3744761 4.11 (1.32;12.74)

rs4362432 3.64 (1.41;9.38)

Chr 20

rs6032180 4.13 (1.47;11.61)

\* Synergy index results were considered significant at p-values  $<2.4 \times 10^{-7}$

Supplemental Table II: Significant gene-smoking interaction results\* after Bonferroni adjustment for multiple testing in relation to C-IMT<sub>max</sub> with cut-off at the 50<sup>th</sup> percentile. A dominant genetic model was assumed<sup>†</sup>.

|             | Number of observations               |       |                                   |       |                                  |       |                               |       | Odds Ratio (95% Confidence Interval) <sup>‡</sup>     |         |                                   |                                  |                               |                        |
|-------------|--------------------------------------|-------|-----------------------------------|-------|----------------------------------|-------|-------------------------------|-------|-------------------------------------------------------|---------|-----------------------------------|----------------------------------|-------------------------------|------------------------|
|             | Non-smokers without the risk variant |       | Non-smokers with the risk variant |       | Smokers without the risk variant |       | Smokers with the risk variant |       | Reference group: Non-smokers without the risk variant |         |                                   |                                  |                               |                        |
|             | Controls                             | Cases | Controls                          | Cases | Controls                         | Cases | Controls                      | Cases | Risk allele                                           | MAF (%) | Non-smokers with the risk variant | Smokers without the risk variant | Smokers with the risk variant | p Synergy index        |
| Chr 1       |                                      |       |                                   |       |                                  |       |                               |       |                                                       |         |                                   |                                  |                               |                        |
| rs11208009  | 1150                                 | 184   | 1098                              | 247   | 158                              | 15    | 152                           | 46    | T                                                     | 35      | 1.04 (0.81;1.33)                  | 1.68 (1.35;2.09)                 | 4.44 (2.4;8.22)               | 9.85x10 <sup>-16</sup> |
| rs11582097  | 773                                  | 135   | 722                               | 151   | 534                              | 63    | 528                           | 142   | A                                                     | 23      | 1.06 (0.9;1.25)                   | 1.45 (1.12;1.89)                 | 2.92 (2.11;4.05)              | 8.19x10 <sup>-10</sup> |
| rs7529090   | 741                                  | 129   | 696                               | 139   | 567                              | 69    | 554                           | 154   | A                                                     | 25      | 1.04 (0.89;1.22)                  | 1.4 (1.06;1.83)                  | 2.85 (2.08;3.9)               | 5.11x10 <sup>-10</sup> |
| rs12068067  | 839                                  | 145   | 780                               | 169   | 469                              | 54    | 470                           | 124   | A                                                     | 20      | 1.07 (0.91;1.26)                  | 1.5 (1.17;1.94)                  | 3.01 (2.13;4.27)              | 5.41x10 <sup>-10</sup> |
| rs12569167  | 1152                                 | 187   | 1095                              | 255   | 156                              | 11    | 154                           | 38    | A                                                     | 6       | 1.06 (0.83;1.36)                  | 1.74 (1.4;2.16)                  | 4.49 (2.2;9.17)               | 2.01x10 <sup>-10</sup> |
| rs143013938 | 1151                                 | 188   | 1096                              | 255   | 156                              | 11    | 154                           | 38    | A                                                     | 6       | 1.06 (0.83;1.36)                  | 1.73 (1.39;2.15)                 | 4.49 (2.2;9.16)               | 1.10x10 <sup>-10</sup> |
| rs12024343  | 1152                                 | 188   | 1095                              | 255   | 156                              | 11    | 155                           | 38    | T                                                     | 6       | 1.07 (0.84;1.37)                  | 1.73 (1.39;2.15)                 | 4.5 (2.2;9.18)                | 1.86x10 <sup>-10</sup> |
| rs6681152   | 1147                                 | 188   | 1094                              | 253   | 158                              | 11    | 156                           | 38    | T                                                     | 6       | 1.06 (0.83;1.36)                  | 1.72 (1.38;2.14)                 | 4.49 (2.2;9.16)               | 7.54x10 <sup>-11</sup> |
| rs76647137  | 1153                                 | 188   | 1095                              | 255   | 155                              | 11    | 155                           | 38    | A                                                     | 6       | 1.07 (0.84;1.37)                  | 1.73 (1.4;2.15)                  | 4.5 (2.2;9.18)                | 2.65x10 <sup>-10</sup> |
| rs150990100 | 1150                                 | 184   | 1099                              | 247   | 158                              | 15    | 151                           | 46    | T                                                     | 35      | 1.03 (0.8;1.32)                   | 1.68 (1.35;2.09)                 | 4.43 (2.4;8.2)                | 3.49x10 <sup>-16</sup> |
| rs164155    | 1174                                 | 185   | 1115                              | 253   | 134                              | 14    | 135                           | 40    | A                                                     | 32      | 1.11 (0.85;1.43)                  | 1.73 (1.39;2.15)                 | 4.06 (2.13;7.72)              | 2.00x10 <sup>-7</sup>  |
| rs17573783  | 1148                                 | 184   | 1093                              | 251   | 160                              | 15    | 157                           | 42    | G                                                     | 6       | 1.07 (0.84;1.36)                  | 1.73 (1.39;2.15)                 | 3.92 (2.1;7.31)               | 1.00x10 <sup>-7</sup>  |
| rs282001    | 1147                                 | 177   | 1089                              | 239   | 161                              | 22    | 161                           | 54    | T                                                     | 7       | 1.03 (0.81;1.31)                  | 1.68 (1.35;2.1)                  | 3.61 (2.09;6.21)              | 1.83x10 <sup>-8</sup>  |
| rs4915853   | 1151                                 | 184   | 1098                              | 247   | 157                              | 15    | 152                           | 46    | A                                                     | 35      | 1.05 (0.82;1.34)                  | 1.68 (1.35;2.09)                 | 4.44 (2.4;8.22)               | 2.03x10 <sup>-15</sup> |
| rs6679002   | 1150                                 | 184   | 1099                              | 247   | 158                              | 15    | 151                           | 46    | T                                                     | 35      | 1.03 (0.8;1.32)                   | 1.68 (1.35;2.09)                 | 4.43 (2.4;8.2)                | 3.49x10 <sup>-16</sup> |
| rs7548334   | 1151                                 | 188   | 1100                              | 256   | 153                              | 11    | 149                           | 37    | T                                                     | 6       | 1.04 (0.81;1.34)                  | 1.73 (1.39;2.15)                 | 4.37 (2.13;8.93)              | 6.97x10 <sup>-10</sup> |
| Chr 2       |                                      |       |                                   |       |                                  |       |                               |       |                                                       |         |                                   |                                  |                               |                        |
| rs10171234  | 1135                                 | 181   | 1078                              | 238   | 172                              | 17    | 171                           | 54    | A                                                     | 7       | 1.03 (0.81;1.3)                   | 1.7 (1.36;2.12)                  | 3.79 (2.13;6.74)              | 2.24x10 <sup>-9</sup>  |
| rs11691338  | 895                                  | 151   | 841                               | 183   | 413                              | 48    | 409                           | 110   | G                                                     | 18      | 1.13 (0.95;1.34)                  | 1.57 (1.22;2)                    | 3.16 (2.19;4.57)              | 2.43x10 <sup>-9</sup>  |
| rs1319213   | 957                                  | 162   | 911                               | 201   | 351                              | 37    | 339                           | 92    | T                                                     | 15      | 1.07 (0.9;1.28)                   | 1.58 (1.24;2)                    | 3.34 (2.23;5.02)              | 1.10x10 <sup>-11</sup> |
| rs1509099   | 984                                  | 166   | 935                               | 202   | 324                              | 33    | 315                           | 91    | C                                                     | 14      | 1.1 (0.91;1.32)                   | 1.55 (1.23;1.96)                 | 3.73 (2.44;5.7)               | 2.45x10 <sup>-17</sup> |
| rs3754956   | 957                                  | 162   | 910                               | 201   | 351                              | 37    | 340                           | 92    | C                                                     | 15      | 1.08 (0.9;1.29)                   | 1.58 (1.24;2)                    | 3.35 (2.23;5.02)              | 1.37x10 <sup>-11</sup> |
| rs3769874   | 957                                  | 162   | 911                               | 201   | 351                              | 37    | 339                           | 92    | T                                                     | 15      | 1.07 (0.9;1.28)                   | 1.58 (1.24;2)                    | 3.34 (2.23;5.02)              | 1.10x10 <sup>-11</sup> |
| rs3769889   | 985                                  | 165   | 934                               | 202   | 323                              | 34    | 316                           | 91    | C                                                     | 14      | 1.1 (0.91;1.32)                   | 1.56 (1.24;1.98)                 | 3.62 (2.38;5.5)               | 4.6x10 <sup>-15</sup>  |
| rs3820989   | 971                                  | 162   | 925                               | 196   | 337                              | 37    | 325                           | 97    | T                                                     | 14      | 1.06 (0.89;1.28)                  | 1.53 (1.2;1.94)                  | 3.57 (2.38;5.36)              | 5.63x10 <sup>-17</sup> |
| rs7574791   | 982                                  | 166   | 934                               | 204   | 326                              | 33    | 316                           | 89    | T                                                     | 14      | 1.09 (0.9;1.31)                   | 1.57 (1.24;1.98)                 | 3.64 (2.38;5.57)              | 1.18x10 <sup>-15</sup> |
| rs79916544  | 982                                  | 166   | 934                               | 204   | 326                              | 33    | 316                           | 89    | T                                                     | 14      | 1.09 (0.9;1.31)                   | 1.57 (1.24;1.98)                 | 3.64 (2.38;5.57)              | 1.18x10 <sup>-15</sup> |
| rs16857518  | 1164                                 | 185   | 1105                              | 247   | 143                              | 13    | 143                           | 45    | A                                                     | 6       | 1.08 (0.84;1.39)                  | 1.71 (1.38;2.13)                 | 4.33 (2.26;8.28)              | 1.10x10 <sup>-10</sup> |
| rs1869325   | 1154                                 | 184   | 1093                              | 246   | 154                              | 15    | 157                           | 47    | G                                                     | 6       | 1.08 (0.84;1.38)                  | 1.72 (1.38;2.14)                 | 4.02 (2.17;7.44)              | 8.21x10 <sup>-9</sup>  |
| rs2854386   | 1173                                 | 189   | 1102                              | 257   | 135                              | 10    | 148                           | 36    | G                                                     | 6       | 1.2 (0.93;1.55)                   | 1.75 (1.41;2.18)                 | 4.81 (2.34;9.9)               | 5.61x10 <sup>-9</sup>  |
| rs4667744   | 901                                  | 156   | 863                               | 182   | 407                              | 43    | 387                           | 111   | C                                                     | 17      | 1.01 (0.85;1.2)                   | 1.48 (1.16;1.89)                 | 3.33 (2.28;4.88)              | 7.12x10 <sup>-17</sup> |
| rs550619    | 1068                                 | 175   | 1012                              | 227   | 240                              | 24    | 238                           | 66    | G                                                     | 10      | 1.05 (0.85;1.29)                  | 1.67 (1.33;2.09)                 | 3.38 (2.08;5.49)              | 6.21x10 <sup>-8</sup>  |
| rs570877    | 1068                                 | 175   | 1012                              | 227   | 240                              | 24    | 238                           | 66    | T                                                     | 10      | 1.05 (0.85;1.29)                  | 1.67 (1.33;2.09)                 | 3.38 (2.08;5.49)              | 6.21x10 <sup>-8</sup>  |



|             |      |     |      |     |     |    |     |     |   |    |                  |                  |                  |                          |
|-------------|------|-----|------|-----|-----|----|-----|-----|---|----|------------------|------------------|------------------|--------------------------|
| rs7588461   | 728  | 137 | 688  | 162 | 580 | 61 | 561 | 130 | G | 25 | 1 (0.85;1.18)    | 1.49 (1.15;1.93) | 2.75 (1.97;3.84) | 1.87x10 <sup>-7</sup>    |
| Chr 3       |      |     |      |     |     |    |     |     |   |    |                  |                  |                  |                          |
| rs11130290  | 993  | 161 | 948  | 206 | 315 | 38 | 302 | 87  | A | 13 | 1.04 (0.87;1.26) | 1.61 (1.27;2.04) | 3.1 (2.06;4.67)  | 5.00x10 <sup>-8</sup>    |
| rs115766450 | 992  | 161 | 948  | 206 | 316 | 38 | 302 | 87  | G | 13 | 1.04 (0.86;1.25) | 1.61 (1.27;2.04) | 3.1 (2.06;4.67)  | 4.13x10 <sup>-8</sup>    |
| rs13088462  | 1179 | 188 | 1120 | 256 | 129 | 11 | 130 | 37  | C | 5  | 1.11 (0.85;1.45) | 1.74 (1.4;2.16)  | 4.51 (2.21;9.21) | 4.27x10 <sup>-9</sup>    |
| rs13097744  | 1178 | 188 | 1119 | 256 | 129 | 11 | 130 | 37  | G | 5  | 1.11 (0.85;1.44) | 1.74 (1.4;2.16)  | 4.5 (2.2;9.2)    | 4.24x10 <sup>-9</sup>    |
| rs1383252   | 1052 | 171 | 991  | 225 | 252 | 27 | 252 | 67  | C | 10 | 1.10 (0.90;1.34) | 1.68 (1.34;2.11) | 3.44 (2.13;5.54) | 1.60x10 <sup>-7</sup>    |
| rs4974108   | 993  | 161 | 948  | 206 | 315 | 38 | 302 | 87  | T | 13 | 1.04 (0.87;1.26) | 1.61 (1.27;2.04) | 3.1 (2.06;4.67)  | 5.00x10 <sup>-8</sup>    |
| rs6445455   | 1054 | 171 | 997  | 224 | 254 | 28 | 253 | 69  | T | 10 | 1.09 (0.89;1.33) | 1.67 (1.33;2.09) | 3.4 (2.13;5.44)  | 7.57x10 <sup>-8</sup>    |
| rs6445601   | 993  | 161 | 947  | 206 | 315 | 38 | 302 | 87  | T | 13 | 1.05 (0.87;1.26) | 1.61 (1.27;2.04) | 3.11 (2.06;4.68) | 5.16x10 <sup>-8</sup>    |
| rs6445604   | 993  | 161 | 948  | 206 | 315 | 38 | 302 | 87  | A | 13 | 1.04 (0.87;1.26) | 1.61 (1.27;2.04) | 3.1 (2.06;4.67)  | 5.00 x 10 <sup>-8</sup>  |
| rs6445611   | 993  | 161 | 948  | 206 | 315 | 38 | 302 | 87  | T | 13 | 1.04 (0.87;1.26) | 1.61 (1.27;2.04) | 3.1 (2.06;4.67)  | 5.00 x 10 <sup>-8</sup>  |
| rs7640083   | 993  | 161 | 948  | 206 | 315 | 38 | 302 | 87  | G | 13 | 1.04 (0.87;1.26) | 1.61 (1.27;2.04) | 3.1 (2.06;4.67)  | 5.00 x 10 <sup>-8</sup>  |
| rs7648012   | 912  | 153 | 862  | 191 | 396 | 46 | 388 | 102 | G | 17 | 1.07 (0.90;1.28) | 1.58 (1.24;2.02) | 3.04 (2.08;4.45) | 4.43 x 10 <sup>-8</sup>  |
| rs7649069   | 992  | 161 | 946  | 206 | 316 | 38 | 304 | 87  | A | 13 | 1.04 (0.87;1.26) | 1.61 (1.27;2.04) | 3.1 (2.06;4.67)  | 5.01 x 10 <sup>-8</sup>  |
| rs9877188   | 993  | 161 | 948  | 206 | 315 | 38 | 302 | 87  | T | 13 | 1.04 (0.87;1.26) | 1.61 (1.27;2.04) | 3.1 (2.06;4.67)  | 5 x 10 <sup>-8</sup>     |
| rs6777719   | 1054 | 171 | 997  | 224 | 254 | 28 | 253 | 69  | T | 10 | 1.09 (0.89;1.33) | 1.67 (1.33;2.09) | 3.4 (2.13;5.44)  | 7.57 x 10 <sup>-8</sup>  |
| rs181877    | 1093 | 177 | 994  | 224 | 215 | 22 | 256 | 69  | G | 10 | 1.24 (1.01;1.53) | 1.69 (1.35;2.12) | 3.98 (2.39;6.63) | 3.7 x 10 <sup>-9</sup>   |
| rs6773525   | 867  | 145 | 780  | 172 | 441 | 54 | 470 | 120 | G | 20 | 1.19 (1.01;1.41) | 1.56 (1.21;2.01) | 3.18 (2.23;4.52) | 5.4 x 10 <sup>-9</sup>   |
| rs7632761   | 953  | 157 | 883  | 199 | 355 | 42 | 367 | 94  | T | 15 | 1.06 (0.89;1.27) | 1.61 (1.27;2.05) | 3.05 (2.05;4.55) | 2.21 x 10 <sup>-7</sup>  |
| Chr 4       |      |     |      |     |     |    |     |     |   |    |                  |                  |                  |                          |
| rs10454793  | 1145 | 179 | 1087 | 240 | 163 | 20 | 163 | 53  | A | 7  | 1.01 (0.8;1.29)  | 1.7 (1.36;2.11)  | 3.57 (2.05;6.21) | 6.42 x 10 <sup>-8</sup>  |
| rs11731522  | 917  | 156 | 850  | 192 | 391 | 43 | 400 | 101 | A | 17 | 1.09 (0.91;1.29) | 1.59 (1.25;2.02) | 3.12 (2.12;4.59) | 1.21 x 10 <sup>-8</sup>  |
| rs2175586   | 1144 | 187 | 1089 | 256 | 164 | 12 | 161 | 37  | A | 6  | 1.04 (0.82;1.32) | 1.74 (1.4;2.16)  | 4.05 (2.04;8.06) | 8.18 x 10 <sup>-8</sup>  |
| Chr 5       |      |     |      |     |     |    |     |     |   |    |                  |                  |                  |                          |
| rs1392279   | 1100 | 181 | 1045 | 237 | 205 | 18 | 204 | 56  | C | 8  | 1.05 (0.84;1.3)  | 1.68 (1.35;2.1)  | 3.73 (2.15;6.46) | 1.03 x 10 <sup>-9</sup>  |
| rs17415614  | 974  | 161 | 929  | 204 | 334 | 38 | 321 | 89  | G | 14 | 1.02 (0.85;1.23) | 1.57 (1.24;1.99) | 3.27 (2.17;4.94) | 8.30 x 10 <sup>-12</sup> |
| rs1858432   | 655  | 113 | 599  | 119 | 653 | 86 | 650 | 174 | G | 30 | 1.09 (0.93;1.28) | 1.38 (1.03;1.84) | 2.73 (2.03;3.67) | 2.17 x 10 <sup>-7</sup>  |
| rs2063564   | 925  | 148 | 853  | 179 | 383 | 51 | 397 | 114 | C | 17 | 1.1 (0.92;1.3)   | 1.55 (1.21;1.98) | 3.08 (2.14;4.43) | 2.67 x 10 <sup>-9</sup>  |
| rs2594849   | 969  | 154 | 905  | 187 | 339 | 45 | 345 | 106 | T | 15 | 1.11 (0.93;1.33) | 1.57 (1.23;2.01) | 3.1 (2.13;4.52)  | 2.16 x 10 <sup>-8</sup>  |
| rs746215    | 807  | 141 | 765  | 157 | 501 | 58 | 485 | 136 | C | 22 | 1 (0.85;1.18)    | 1.4 (1.08;1.82)  | 3.08 (2.19;4.33) | 8.91 x 10 <sup>-15</sup> |
| rs756452    | 1145 | 188 | 1087 | 255 | 163 | 11 | 163 | 38  | A | 6  | 1.03 (0.81;1.31) | 1.72 (1.39;2.14) | 4.25 (2.13;8.47) | 3.55 x 10 <sup>-10</sup> |
| Chr 6       |      |     |      |     |     |    |     |     |   |    |                  |                  |                  |                          |
| rs1265045   | 860  | 152 | 806  | 180 | 448 | 47 | 444 | 113 | A | 19 | 1.04 (0.88;1.23) | 1.51 (1.18;1.93) | 3.21 (2.21;4.66) | 4.19 x 10 <sup>-13</sup> |
| rs1265100   | 934  | 155 | 878  | 197 | 374 | 44 | 372 | 96  | G | 16 | 1.04 (0.87;1.24) | 1.59 (1.25;2.02) | 3.01 (2.04;4.44) | 7.64 x 10 <sup>-8</sup>  |
| rs2844633   | 848  | 151 | 796  | 175 | 454 | 48 | 443 | 116 | T | 20 | 1.03 (0.87;1.22) | 1.48 (1.15;1.9)  | 3.19 (2.21;4.61) | 7.01 x 10 <sup>-14</sup> |
| rs1933650   | 1093 | 177 | 1047 | 233 | 215 | 22 | 203 | 60  | T | 9  | 1.04 (0.83;1.28) | 1.68 (1.34;2.1)  | 3.48 (2.08;5.83) | 3.34 x 10 <sup>-08</sup> |
| rs3957146   | 1063 | 178 | 1007 | 236 | 245 | 21 | 243 | 57  | C | 10 | 1.03 (0.84;1.26) | 1.68 (1.34;2.1)  | 3.68 (2.16;6.3)  | 3.26 x 10 <sup>-10</sup> |
| rs3957148   | 1055 | 178 | 1003 | 237 | 253 | 21 | 247 | 56  | G | 10 | 1.01 (0.83;1.24) | 1.67 (1.34;2.09) | 3.66 (2.14;6.27) | 1.66 x 10 <sup>-10</sup> |
| rs3998159   | 1052 | 178 | 1002 | 236 | 256 | 21 | 248 | 57  | C | 10 | 1.01 (0.82;1.23) | 1.67 (1.33;2.09) | 3.66 (2.14;6.26) | 5.73 x 10 <sup>-11</sup> |
| rs41282644  | 1141 | 183 | 1077 | 242 | 167 | 16 | 173 | 51  | A | 7  | 1.03 (0.81;1.3)  | 1.7 (1.36;2.11)  | 3.81 (2.13;6.8)  | 1.48 x 10 <sup>-09</sup> |
| rs7454108   | 1061 | 178 | 1005 | 235 | 245 | 21 | 242 | 57  | C | 10 | 1.03 (0.84;1.26) | 1.68 (1.34;2.1)  | 3.69 (2.16;6.3)  | 2.65 x 10 <sup>-10</sup> |
| rs9275184   | 1053 | 177 | 1003 | 235 | 238 | 21 | 239 | 57  | C | 10 | 1.04 (0.85;1.28) | 1.68 (1.34;2.1)  | 3.69 (2.16;6.3)  | 6.23 x 10 <sup>-10</sup> |

|            |      |     |      |     |     |    |     |     |   |    |                  |                  |                   |                          |
|------------|------|-----|------|-----|-----|----|-----|-----|---|----|------------------|------------------|-------------------|--------------------------|
| rs9275206  | 1061 | 177 | 1004 | 235 | 243 | 20 | 243 | 57  | G | 10 | 1.04 (0.85;1.28) | 1.68 (1.34;2.11) | 3.87 (2.24;6.67)  | 1.31 x 10 <sup>-11</sup> |
| rs9275221  | 1057 | 177 | 998  | 233 | 242 | 21 | 238 | 57  | C | 10 | 1.02 (0.83;1.26) | 1.66 (1.33;2.08) | 3.7 (2.16;6.32)   | 6.03 x 10 <sup>-11</sup> |
| rs9275334  | 1061 | 177 | 1003 | 235 | 247 | 22 | 246 | 58  | C | 10 | 1.04 (0.85;1.27) | 1.68 (1.34;2.11) | 3.56 (2.11;6.02)  | 9.64 x 10 <sup>-9</sup>  |
| rs9275383  | 1033 | 174 | 978  | 224 | 275 | 25 | 272 | 69  | T | 11 | 1.02 (0.84;1.24) | 1.64 (1.3;2.05)  | 3.6 (2.21;5.87)   | 4.43 x 10 <sup>-12</sup> |
| rs9275495  | 1060 | 177 | 1003 | 235 | 247 | 22 | 246 | 58  | T | 10 | 1.04 (0.85;1.27) | 1.68 (1.34;2.1)  | 3.56 (2.1;6.01)   | 9.05 x 10 <sup>-9</sup>  |
| rs9275530  | 1061 | 177 | 1004 | 235 | 247 | 22 | 246 | 58  | C | 10 | 1.04 (0.85;1.27) | 1.68 (1.34;2.1)  | 3.56 (2.11;6.02)  | 9.13 x 10 <sup>-9</sup>  |
| rs9275532  | 1061 | 177 | 1004 | 235 | 247 | 22 | 246 | 58  | G | 10 | 1.04 (0.85;1.27) | 1.68 (1.34;2.1)  | 3.56 (2.11;6.02)  | 9.13 x 10 <sup>-9</sup>  |
| rs9321228  | 1118 | 186 | 1068 | 247 | 190 | 13 | 182 | 46  | T | 7  | 1.03 (0.82;1.29) | 1.66 (1.34;2.07) | 5.37 (2.74;10.54) | 2.23 x 10 <sup>-28</sup> |
| rs9359725  | 1037 | 176 | 973  | 223 | 271 | 23 | 277 | 70  | C | 11 | 1.04 (0.86;1.27) | 1.63 (1.3;2.04)  | 3.84 (2.34;6.29)  | 3.28 x 10 <sup>-15</sup> |
| rs9396195  | 1188 | 184 | 1126 | 249 | 120 | 15 | 124 | 44  | A | 5  | 1.03 (0.78;1.36) | 1.71 (1.38;2.13) | 3.84 (2.1;7.03)   | 2.9 x 10 <sup>-8</sup>   |
| Chr 7      |      |     |      |     |     |    |     |     |   |    |                  |                  |                   |                          |
| rs56006970 | 1108 | 178 | 1056 | 237 | 200 | 21 | 194 | 56  | T | 8  | 1 (0.8;1.25)     | 1.68 (1.34;2.1)  | 3.53 (2.08;6.01)  | 5.46 x 10 <sup>-9</sup>  |
| rs651841   | 977  | 159 | 917  | 201 | 331 | 40 | 333 | 92  | A | 14 | 1.04 (0.87;1.25) | 1.56 (1.23;1.98) | 3.3 (2.21;4.93)   | 3.43 x 10 <sup>-12</sup> |
| rs663911   | 950  | 153 | 889  | 194 | 358 | 46 | 361 | 99  | T | 15 | 1.06 (0.89;1.27) | 1.57 (1.23;2)    | 3.11 (2.12;4.56)  | 2.40 x 10 <sup>-9</sup>  |
| rs6958510  | 1030 | 164 | 954  | 207 | 278 | 34 | 296 | 86  | T | 12 | 1.15 (0.95;1.39) | 1.63 (1.29;2.06) | 3.5 (2.27;5.39)   | 9.91 x 10 <sup>-10</sup> |
| rs77327146 | 1182 | 187 | 1102 | 255 | 126 | 12 | 148 | 38  | G | 5  | 1.13 (0.87;1.47) | 1.74 (1.4;2.16)  | 4.44 (2.23;8.86)  | 1.14 x 10 <sup>-8</sup>  |
| Chr 8      |      |     |      |     |     |    |     |     |   |    |                  |                  |                   |                          |
| rs10110877 | 1136 | 185 | 1082 | 250 | 166 | 14 | 163 | 42  | C | 7  | 1.02 (0.8;1.3)   | 1.71 (1.37;2.12) | 3.92 (2.1;7.33)   | 2.37 x 10 <sup>-9</sup>  |
| rs10217099 | 1164 | 184 | 1092 | 246 | 144 | 15 | 158 | 47  | C | 6  | 1.15 (0.9;1.48)  | 1.73 (1.39;2.15) | 4.1 (2.21;7.6)    | 1 x 10 <sup>-7</sup>     |
| rs2941652  | 1094 | 174 | 1012 | 219 | 214 | 25 | 238 | 74  | G | 10 | 1.14 (0.92;1.4)  | 1.65 (1.31;2.07) | 3.67 (2.28;5.89)  | 4.45 x 10 <sup>-10</sup> |
| rs7818319  | 1093 | 175 | 1038 | 229 | 215 | 24 | 212 | 64  | A | 9  | 1.04 (0.84;1.29) | 1.67 (1.34;2.1)  | 3.37 (2.06;5.54)  | 1.91 x 10 <sup>-7</sup>  |
| rs8192330  | 1116 | 176 | 1048 | 231 | 192 | 23 | 202 | 62  | A | 8  | 1.01 (0.81;1.26) | 1.65 (1.32;2.07) | 3.58 (2.16;5.93)  | 6.92 x 10 <sup>-11</sup> |
| Chr 9      |      |     |      |     |     |    |     |     |   |    |                  |                  |                   |                          |
| rs6478342  | 877  | 156 | 813  | 187 | 431 | 43 | 437 | 106 | C | 18 | 1.08 (0.92;1.28) | 1.55 (1.21;1.98) | 3.29 (2.24;4.83)  | 3.35 x 10 <sup>-12</sup> |
| rs7025754  | 1016 | 164 | 961  | 204 | 292 | 35 | 289 | 89  | C | 12 | 1.03 (0.85;1.25) | 1.58 (1.25;2)    | 3.28 (2.16;4.98)  | 4.24 x 10 <sup>-11</sup> |
| rs9406646  | 949  | 153 | 912  | 199 | 359 | 46 | 338 | 94  | T | 15 | 1.01 (0.84;1.2)  | 1.57 (1.24;2)    | 2.93 (2;4.29)     | 7.63 x 10 <sup>-8</sup>  |
| Chr 10     |      |     |      |     |     |    |     |     |   |    |                  |                  |                   |                          |
| rs16930144 | 1146 | 178 | 1081 | 240 | 162 | 20 | 169 | 53  | G | 7  | 1.07 (0.84;1.36) | 1.7 (1.36;2.13)  | 3.61 (2.1;6.21)   | 2.29 x 10 <sup>-7</sup>  |
| rs7072256  | 938  | 152 | 883  | 186 | 369 | 47 | 367 | 107 | A | 16 | 1.02 (0.85;1.21) | 1.54 (1.21;1.97) | 2.98 (2.05;4.32)  | 3.50 x 10 <sup>-9</sup>  |
| rs17875327 | 1037 | 166 | 978  | 208 | 270 | 33 | 272 | 85  | G | 12 | 1.04 (0.85;1.26) | 1.6 (1.27;2.02)  | 3.27 (2.14;5.01)  | 5.32 x 10 <sup>-10</sup> |
| rs2245348  | 1154 | 186 | 1091 | 252 | 154 | 13 | 159 | 41  | G | 6  | 1.06 (0.83;1.35) | 1.72 (1.38;2.14) | 4.35 (2.24;8.44)  | 2.79 x 10 <sup>-11</sup> |
| rs1862082  | 1154 | 186 | 1090 | 251 | 154 | 13 | 160 | 42  | T | 6  | 1.07 (0.84;1.36) | 1.72 (1.38;2.13) | 4.44 (2.29;8.61)  | 4.41 x 10 <sup>-12</sup> |
| rs2474754  | 1154 | 186 | 1090 | 252 | 154 | 13 | 160 | 41  | C | 6  | 1.07 (0.84;1.36) | 1.72 (1.39;2.14) | 4.35 (2.24;8.46)  | 5.78 x 10 <sup>-11</sup> |
| rs2474755  | 1154 | 186 | 1089 | 251 | 154 | 13 | 160 | 42  | C | 6  | 1.07 (0.84;1.36) | 1.72 (1.38;2.13) | 4.44 (2.29;8.61)  | 4.7 x 10 <sup>-12</sup>  |
| rs2474756  | 1154 | 186 | 1090 | 251 | 154 | 13 | 160 | 42  | T | 6  | 1.07 (0.84;1.36) | 1.72 (1.38;2.13) | 4.44 (2.29;8.61)  | 4.41 x 10 <sup>-12</sup> |
| rs2474757  | 1154 | 186 | 1090 | 251 | 154 | 13 | 160 | 42  | G | 6  | 1.07 (0.84;1.36) | 1.72 (1.38;2.13) | 4.44 (2.29;8.61)  | 4.41 x 10 <sup>-12</sup> |
| rs2474758  | 1154 | 186 | 1090 | 251 | 154 | 13 | 160 | 42  | A | 6  | 1.07 (0.84;1.36) | 1.72 (1.38;2.13) | 4.44 (2.29;8.61)  | 4.41 x 10 <sup>-12</sup> |
| rs2474759  | 1154 | 186 | 1090 | 251 | 154 | 13 | 160 | 42  | C | 6  | 1.07 (0.84;1.36) | 1.72 (1.38;2.13) | 4.44 (2.29;8.61)  | 4.41 x 10 <sup>-12</sup> |
| rs2506107  | 1154 | 186 | 1090 | 251 | 154 | 13 | 160 | 42  | A | 6  | 1.07 (0.84;1.36) | 1.72 (1.38;2.13) | 4.44 (2.29;8.61)  | 4.41 x 10 <sup>-12</sup> |
| rs2506108  | 1154 | 186 | 1090 | 251 | 154 | 13 | 160 | 42  | G | 6  | 1.07 (0.84;1.36) | 1.72 (1.38;2.13) | 4.44 (2.29;8.61)  | 4.41 x 10 <sup>-12</sup> |
| rs2506109  | 1154 | 186 | 1090 | 251 | 154 | 13 | 160 | 42  | G | 6  | 1.07 (0.84;1.36) | 1.72 (1.38;2.13) | 4.44 (2.29;8.61)  | 4.41 x 10 <sup>-12</sup> |
| rs2506110  | 1154 | 186 | 1090 | 251 | 154 | 13 | 160 | 42  | G | 6  | 1.07 (0.84;1.36) | 1.72 (1.38;2.13) | 4.44 (2.29;8.61)  | 4.41 x 10 <sup>-12</sup> |
| rs56668170 | 1147 | 183 | 1089 | 248 | 161 | 16 | 161 | 45  | A | 7  | 1.03 (0.81;1.31) | 1.71 (1.38;2.13) | 3.83 (2.09;7)     | 1.47 x 10 <sup>-08</sup> |

|            |      |     |      |     |     |    |     |     |   |    |                  |                  |                   |                          |
|------------|------|-----|------|-----|-----|----|-----|-----|---|----|------------------|------------------|-------------------|--------------------------|
| Chr 11     |      |     |      |     |     |    |     |     |   |    |                  |                  |                   |                          |
| rs11603873 | 1070 | 175 | 1019 | 233 | 237 | 24 | 231 | 60  | G | 9  | 1 (0.81;1.23)    | 1.67 (1.34;2.09) | 3.31 (2.01;5.47)  | 1.26 x 10 <sup>-7</sup>  |
| rs58858617 | 1071 | 175 | 1019 | 233 | 237 | 24 | 231 | 60  | C | 9  | 1 (0.81;1.23)    | 1.67 (1.34;2.1)  | 3.32 (2.01;5.47)  | 1.29 x 10 <sup>-7</sup>  |
| rs16938342 | 1166 | 185 | 1111 | 251 | 142 | 14 | 139 | 42  | T | 6  | 1.08 (0.84;1.39) | 1.72 (1.39;2.14) | 3.91 (2.1;7.29)   | 2.1 x 10 <sup>-7</sup>   |
| rs2237898  | 1144 | 183 | 1086 | 245 | 164 | 16 | 164 | 48  | C | 7  | 1.06 (0.84;1.35) | 1.7 (1.37;2.12)  | 3.98 (2.19;7.22)  | 8.71 x 10 <sup>-10</sup> |
| rs3758768  | 1063 | 169 | 1012 | 215 | 245 | 30 | 238 | 78  | C | 10 | 1.02 (0.83;1.25) | 1.62 (1.29;2.04) | 3.3 (2.11;5.16)   | 1.3 x 10 <sup>-09</sup>  |
| rs4909953  | 1155 | 184 | 1103 | 248 | 153 | 15 | 147 | 45  | A | 6  | 1.05 (0.82;1.35) | 1.71 (1.37;2.13) | 4.04 (2.18;7.49)  | 9.94 x 10 <sup>-10</sup> |
| Chr 12     |      |     |      |     |     |    |     |     |   |    |                  |                  |                   |                          |
| rs12318758 | 1123 | 177 | 1067 | 232 | 185 | 22 | 182 | 61  | T | 8  | 1.01 (0.8;1.27)  | 1.66 (1.33;2.08) | 3.59 (2.14;6.02)  | 3.03 x 10 <sup>-10</sup> |
| rs12829836 | 1100 | 179 | 1043 | 239 | 208 | 20 | 207 | 54  | G | 8  | 1.05 (0.84;1.3)  | 1.7 (1.36;2.12)  | 3.72 (2.11;6.55)  | 1.04 x 10 <sup>-8</sup>  |
| rs12831974 | 1006 | 163 | 945  | 209 | 302 | 36 | 305 | 84  | C | 13 | 1.03 (0.85;1.25) | 1.59 (1.26;2.01) | 3.32 (2.17;5.08)  | 2.22 x 10 <sup>-11</sup> |
| rs2555296  | 1080 | 178 | 1014 | 234 | 228 | 21 | 236 | 59  | A | 10 | 1.05 (0.85;1.29) | 1.66 (1.33;2.08) | 3.85 (2.27;6.53)  | 1.61 x 10 <sup>-12</sup> |
| rs874619   | 932  | 155 | 885  | 197 | 376 | 44 | 365 | 96  | A | 16 | 1.03 (0.87;1.23) | 1.59 (1.25;2.02) | 2.96 (2.01;4.35)  | 2.13 x 10 <sup>-7</sup>  |
| Chr 13     |      |     |      |     |     |    |     |     |   |    |                  |                  |                   |                          |
| rs11841001 | 1057 | 169 | 1004 | 223 | 251 | 30 | 246 | 70  | A | 10 | 1.05 (0.85;1.28) | 1.64 (1.3;2.06)  | 3.4 (2.14;5.39)   | 1.74 x 10 <sup>-9</sup>  |
| rs11841544 | 1056 | 169 | 1004 | 222 | 252 | 30 | 246 | 71  | A | 10 | 1.04 (0.85;1.27) | 1.63 (1.3;2.05)  | 3.43 (2.17;5.45)  | 1.66 x 10 <sup>-10</sup> |
| rs1414320  | 1037 | 173 | 985  | 227 | 271 | 25 | 265 | 66  | G | 11 | 1.06 (0.87;1.29) | 1.67 (1.33;2.1)  | 3.42 (2.11;5.52)  | 3.1 x 10 <sup>-8</sup>   |
| Chr 14     |      |     |      |     |     |    |     |     |   |    |                  |                  |                   |                          |
| rs17109084 | 1064 | 169 | 1000 | 208 | 244 | 30 | 250 | 85  | A | 11 | 1.04 (0.85;1.28) | 1.6 (1.27;2.02)  | 3.35 (2.17;5.19)  | 1.2 x 10 <sup>-10</sup>  |
| rs17175304 | 1153 | 187 | 1101 | 252 | 155 | 12 | 149 | 41  | A | 6  | 1.04 (0.81;1.33) | 1.71 (1.37;2.12) | 4.51 (2.33;8.75)  | 4.62 x 10 <sup>-14</sup> |
| rs1775671  | 1120 | 184 | 1061 | 245 | 188 | 15 | 189 | 48  | C | 7  | 1.12 (0.89;1.41) | 1.72 (1.38;2.15) | 3.93 (2.16;7.13)  | 1.39 x 10 <sup>-07</sup> |
| Chr 15     |      |     |      |     |     |    |     |     |   |    |                  |                  |                   |                          |
| rs12148293 | 1118 | 175 | 1062 | 233 | 190 | 24 | 188 | 60  | T | 8  | 1.01 (0.8;1.26)  | 1.67 (1.33;2.08) | 3.44 (2.08;5.68)  | 6.16 x 10 <sup>-9</sup>  |
| Chr 16     |      |     |      |     |     |    |     |     |   |    |                  |                  |                   |                          |
| rs1552273  | 887  | 152 | 843  | 182 | 419 | 47 | 407 | 110 | A | 18 | 1 (0.84;1.19)    | 1.53 (1.2;1.96)  | 2.91 (2.01;4.2)   | 1.24 x 10 <sup>-8</sup>  |
| rs2549732  | 1121 | 182 | 1064 | 249 | 187 | 17 | 186 | 44  | A | 7  | 1.05 (0.84;1.32) | 1.72 (1.38;2.14) | 3.71 (2.06;6.7)   | 2.29 x 10 <sup>-7</sup>  |
| rs258160   | 964  | 158 | 899  | 191 | 342 | 41 | 351 | 102 | C | 15 | 1.05 (0.88;1.26) | 1.57 (1.23;2)    | 3.09 (2.1;4.57)   | 3.59 x 10 <sup>-9</sup>  |
| rs8049897  | 1013 | 168 | 953  | 221 | 295 | 31 | 297 | 72  | A | 12 | 1.02 (0.84;1.23) | 1.64 (1.31;2.07) | 3.14 (2.02;4.89)  | 1.5 x 10 <sup>-7</sup>   |
| Chr 17     |      |     |      |     |     |    |     |     |   |    |                  |                  |                   |                          |
| rs11867392 | 1123 | 174 | 1058 | 236 | 185 | 25 | 192 | 57  | T | 8  | 1.11 (0.89;1.39) | 1.68 (1.35;2.1)  | 3.91 (2.29;6.7)   | 2.07 x 10 <sup>-10</sup> |
| rs12938678 | 871  | 146 | 822  | 182 | 437 | 53 | 428 | 111 | A | 19 | 1.04 (0.87;1.23) | 1.55 (1.21;1.99) | 2.89 (2.02;4.15)  | 1.17 x 10 <sup>-7</sup>  |
| rs3744761  | 1190 | 189 | 1131 | 253 | 118 | 10 | 119 | 40  | T | 5  | 1.01 (0.76;1.33) | 1.72 (1.38;2.13) | 4.52 (2.22;9.21)  | 6.95 x 10 <sup>-13</sup> |
| rs9901525  | 857  | 148 | 815  | 179 | 451 | 51 | 435 | 114 | C | 19 | 1.02 (0.86;1.2)  | 1.52 (1.19;1.95) | 2.94 (2.05;4.2)   | 2.84 x 10 <sup>-9</sup>  |
| Chr 18     |      |     |      |     |     |    |     |     |   |    |                  |                  |                   |                          |
| rs17082725 | 1125 | 180 | 1072 | 244 | 183 | 18 | 178 | 49  | T | 7  | 1.05 (0.83;1.32) | 1.71 (1.37;2.14) | 3.79 (2.14;6.7)   | 1.12 x 10 <sup>-8</sup>  |
| Chr 19     |      |     |      |     |     |    |     |     |   |    |                  |                  |                   |                          |
| rs10426583 | 767  | 133 | 735  | 145 | 539 | 64 | 515 | 148 | C | 24 | 1.01 (0.86;1.19) | 1.39 (1.06;1.82) | 2.86 (2.07;3.93)  | 9.85 x 10 <sup>-11</sup> |
| Chr 20     |      |     |      |     |     |    |     |     |   |    |                  |                  |                   |                          |
| rs17329208 | 1157 | 182 | 1096 | 249 | 151 | 17 | 154 | 44  | C | 6  | 1.12 (0.88;1.44) | 1.72 (1.38;2.14) | 3.98 (2.18;7.28)  | 1.03 x 10 <sup>7</sup>   |
| rs6032180  | 1085 | 172 | 1030 | 230 | 223 | 27 | 220 | 63  | T | 9  | 1.05 (0.85;1.29) | 1.67 (1.33;2.09) | 3.38 (2.07;5.52)  | 9.66 x 10 <sup>-8</sup>  |
| rs6037397  | 1104 | 185 | 1029 | 240 | 204 | 14 | 221 | 53  | T | 8  | 1.16 (0.93;1.43) | 1.68 (1.35;2.1)  | 4.98 (2.67;9.29)  | 2.5 x 10 <sup>-18</sup>  |
| rs6048171  | 1179 | 189 | 1128 | 255 | 129 | 10 | 122 | 38  | C | 5  | 1.04 (0.8;1.36)  | 1.7 (1.37;2.12)  | 5.37 (2.55;11.29) | 1.36 x 10 <sup>-20</sup> |
| rs6118390  | 1010 | 170 | 968  | 218 | 298 | 29 | 282 | 75  | C | 12 | 1.04 (0.86;1.26) | 1.61 (1.28;2.03) | 3.54 (2.24;5.57)  | 6.15 x 10 <sup>-13</sup> |

|           |      |     |      |     |     |    |     |    |   |    |                  |                  |                  |                          |
|-----------|------|-----|------|-----|-----|----|-----|----|---|----|------------------|------------------|------------------|--------------------------|
| rs731428  | 1163 | 187 | 1101 | 254 | 145 | 12 | 149 | 39 | C | 6  | 1.13 (0.88;1.45) | 1.75 (1.41;2.17) | 4.43 (2.17;9.04) | 5.92 x 10 <sup>-8</sup>  |
| Chr 21    |      |     |      |     |     |    |     |    |   |    |                  |                  |                  |                          |
| rs2837461 | 1087 | 175 | 1013 | 219 | 221 | 24 | 237 | 74 | G | 10 | 1.18 (0.96;1.45) | 1.67 (1.33;2.1)  | 3.63 (2.23;5.91) | 7.85 x 10 <sup>-8</sup>  |
| rs3788061 | 1123 | 177 | 1071 | 243 | 185 | 22 | 179 | 50 | A | 7  | 1.03 (0.82;1.3)  | 1.68 (1.35;2.1)  | 3.75 (2.17;6.48) | 4.86 x 10 <sup>-10</sup> |

MAF: minor allele frequency

\* Synergy index results were considered significant at p-values <2.4x10<sup>-7</sup>; Minimum number of subjects in each group:10

† Individuals who carry either one or two copies of the risk allele are considered to carry the risk variant

‡ Model adjusted for sex, age, education (categorical), physical activity (categorical), Mediterranean diet score and population structure (MDS1-3 continuous)

Supplemental Table III: Genes in proximity to the genetic variants included in the significant gene-smoking interaction results observed for C-IMT<sub>max</sub> with cut-off at the 50<sup>th</sup> percentile

|             | Position          | Function                      | Gene in proximity to the genetic variant |
|-------------|-------------------|-------------------------------|------------------------------------------|
| Chr 1       |                   |                               |                                          |
| rs11208009  | 62730021          | Intergenic variant            | None                                     |
| rs11582097  | 246871729         | Intron variant                | <i>AHCTF1</i>                            |
| rs7529090   | 246905930         | Intron variant                | <i>AHCTF1</i>                            |
| rs12068067  | 246862636         | Intron variant                | <i>AHCTF1</i>                            |
| rs12569167  | 91986652          | Intron variant                | <i>BRDT</i>                              |
| rs143013938 | 91989182-91989200 | Intron variant                | <i>BRDT</i>                              |
| rs12024343  | 91998118          | Intron variant                | <i>BRDT</i>                              |
| rs6681152   | 92013275          | Intron variant                | <i>BRDT</i>                              |
| rs76647137  | 92013746          | Intron variant                | <i>BRDT</i>                              |
| rs150990100 | 62733677          | Intergenic variant            | None                                     |
| rs164155    | 162372551         | Intergenic variant            | None                                     |
| rs17573783  | 108181218         | Intron variant                | <i>SLC25A24</i>                          |
| rs282001    | 91321022          | Intron variant                | <i>HFM1</i>                              |
| rs4915853   | 62725906          | Intergenic variant            | None                                     |
| rs6679002   | 62734265          | Intergenic variant            | None                                     |
| rs7548334   | 92027662          | Intergenic variant            | None                                     |
| Chr 2       |                   |                               |                                          |
| rs10171234  | 106688521         | Intergenic variant            | None                                     |
| rs11691338  | 164783678         | Intron Variant                | <i>COBLL1</i>                            |
| rs1319213   | 164718780         | Intron Variant                | <i>COBLL1</i>                            |
| rs1509099   | 164771494         | Intron Variant                | <i>COBLL1</i>                            |
| rs3754956   | 164719135         | Intron Variant                | <i>COBLL1</i>                            |
| rs3769874   | 164712075         | Intron Variant                | <i>COBLL1</i>                            |
| rs3769889   | 164744447         | Intron Variant                | <i>COBLL1</i>                            |
| rs3820989   | 164780775         | Intron Variant                | <i>COBLL1</i>                            |
| rs7574791   | 164733949         | Intron Variant                | <i>COBLL1</i>                            |
| rs79916544  | 164728852         | Intron Variant                | <i>COBLL1</i>                            |
| rs16857518  | 170044398         | Intron Variant                | <i>UBR3</i>                              |
| rs1869325   | 137327004         | Intron variant                | <i>THSD7B</i>                            |
| rs2854386   | 218162779         | Downstream transcript variant | <i>CXCR1</i>                             |
| rs4667744   | 164305368         | Intergenic variant            | None                                     |
| rs550619    | 21037729          | Intron variant                | <i>APOB</i>                              |
| rs570877    | 21028168          | Intron variant                | <i>APOB</i>                              |
| rs7588461   | 230370064         | Intron variant                | <i>SP140L</i>                            |
| Chr 3       |                   |                               |                                          |
| rs11130290  | 51311103          | Intron variant                | <i>DOCK3</i>                             |

|             |           |                                    |                                   |
|-------------|-----------|------------------------------------|-----------------------------------|
| rs115766450 | 51307891  | Intron variant                     | <i>DOCK3</i>                      |
| rs13088462  | 51034282  | Intron Variant                     | <i>DOCK3</i>                      |
| rs13097744  | 50957594  | Intron Variant                     | <i>DOCK3</i>                      |
| rs1383252   | 51223655  | Intron Variant                     | <i>DOCK3</i>                      |
| rs4974108   | 51305640  | Intron Variant                     | <i>DOCK3</i>                      |
| rs6445455   | 51163181  | Intron Variant                     | <i>DOCK3</i>                      |
| rs6445601   | 51297167  | Intron Variant                     | <i>DOCK3</i>                      |
| rs6445604   | 51298161  | Intron Variant                     | <i>DOCK3</i>                      |
| rs6445611   | 51306999  | Intron Variant                     | <i>DOCK3</i>                      |
| rs7640083   | 51309674  | Intron Variant                     | <i>DOCK3</i>                      |
| rs7648012   | 51317140  | Intron Variant                     | <i>DOCK3</i>                      |
| rs7649069   | 51313625  | Intron Variant                     | <i>DOCK3</i>                      |
| rs9877188   | 51306291  | Intron Variant                     | <i>DOCK3</i>                      |
| rs6777719   | 51163981  | Intron Variant                     | <i>DOCK3</i>                      |
| rs181877    | 138376056 | Intron Variant                     | <i>MRAS</i>                       |
| rs6773525   | 190803931 | Intergenic variant                 | None                              |
| rs7632761   | 117481408 | Intergenic variant                 | None                              |
| Chr 4       |           |                                    |                                   |
| rs10454793  | 117481408 | Intergenic variant                 | None                              |
| rs11731522  | 26048425  | Intergenic variant                 | None                              |
| rs2175586   | 144575789 | Intergenic variant                 | None                              |
| Chr 5       |           |                                    |                                   |
| rs1392279   | 166293601 | Intergenic variant                 | None                              |
| rs17415614  | 143761457 | Intergenic variant                 | None                              |
| rs1858432   | 19398208  | Intergenic variant                 | None                              |
| rs2063564   | 19337298  | Intergenic variant                 | None                              |
| rs2594849   | 173760886 | Intergenic variant                 | None                              |
| rs746215    | 173584350 | Non-coding transcript variant      | <i>LOC285593 and LOC105377735</i> |
| rs756452    | 86372315  | Intron Variant                     | <i>LOC105379064</i>               |
| Chr 6       |           |                                    |                                   |
| rs1265045   | 31117563  | Intron variant                     | <i>CDSN and PSORS1C1</i>          |
| rs1265100   | 31137533  | Intron variant; downstream variant | <i>PSORS1C1 and PSORS1C2</i>      |
| rs2844633   | 31128412  | Intron variant; downstream variant | <i>PSORS1C1</i>                   |
| rs1933650   | 749311    | Intron variant                     | <i>LOC105374873</i>               |
| rs3957146   | 32713753  | Intergenic variant                 | None                              |
| rs3957148   | 32714360  | Intergenic variant                 | None                              |
| rs3998159   | 32714242  | Intergenic variant                 | None                              |
| rs41282644  | 43785985  | Intron variant; prime UTR* variant | <i>POLR1; CVEGFA</i>              |
| rs7454108   | 32713706  | Intergenic variant                 | None                              |
| rs9275184   | 32686937  | Intergenic variant                 | None                              |
| rs9275206   | 32689788  | Intergenic variant                 | None                              |
| rs9275221   | 32691322  | Intergenic variant                 | None                              |
| rs9275334   | 32699330  | Intergenic variant                 | None                              |

|            |                     |                                  |                       |
|------------|---------------------|----------------------------------|-----------------------|
| rs9275383  | 32701069            | Intergenic variant               | None                  |
| rs9275495  | 32705797            | Intergenic variant               | None                  |
| rs9275530  | 32707746            | Intergenic variant               | None                  |
| rs9275532  | 32707857            | Intergenic variant               | None                  |
| rs9321228  | 130460110           | Intergenic variant               | None                  |
| rs9359725  | 87043599            | Intergenic variant               | None                  |
| rs9396195  | 56298323            | Intron variant                   | <i>COL21A1</i>        |
| Chr 7      |                     |                                  |                       |
| rs56006970 | 128924100-128924110 | Intergenic variant               | None                  |
| rs651841   | 4153005             | Intron variant                   | <i>SDK1</i>           |
| rs663911   | 4152536             | Intron variant                   | <i>SDK1</i>           |
| rs6958510  | 142272000           | Non-coding transcript variant    | <i>TRY2P</i>          |
| rs77327146 | 14457730            | Intron variant                   | <i>DGKB</i>           |
| Chr 8      |                     |                                  |                       |
| rs10110877 | 61236173            | Intron variant                   | <i>CLVS1</i>          |
| rs10217099 | 27164195            | Intergenic variant               | None                  |
| rs2941652  | 105351844           | Intergenic variant               | <i>ZFPM2</i>          |
| rs7818319  | 127597397           | Intergenic variant               | None                  |
| rs8192330  | 22163617            | Intron variant; upstream variant | <i>BMP1 and SFTPC</i> |
| Chr 9      |                     |                                  |                       |
| rs6478342  | 117970446           | Intergenic variant               | None                  |
| rs7025754  | 4784933             | Intergenic variant               | None                  |
| rs9406646  | 16405575            | Intergenic variant               | None                  |
| Chr 10     |                     |                                  |                       |
| rs16930144 | 29311311            | Intron variant                   | <i>LYZL1</i>          |
| rs7072256  | 29298594            | Intron variant                   | <i>LYZL1</i>          |
| rs17875327 | 92515052            | Intron variant                   | <i>IDE</i>            |
| rs2245348  | 35587790            | Intergenic variant               | None                  |
| rs1862082  | 35586427            | Downstream variant               | <i>LOC107984221</i>   |
| rs2474754  | 35586803            | Downstream variant               | <i>LOC107984221</i>   |
| rs2474755  | 35585967            | Non-coding transcript variant    | <i>LOC107984221</i>   |
| rs2474756  | 35585451            | Non-coding transcript variant    | <i>LOC107984221</i>   |
| rs2474757  | 35584565            | Non-coding transcript variant    | <i>LOC107984221</i>   |
| rs2474758  | 35584527            | Non-coding transcript variant    | <i>LOC107984221</i>   |
| rs2474759  | 35584146            | Non-coding transcript variant    | <i>LOC107984221</i>   |
| rs2506107  | 35585734            | Non-coding transcript variant    | <i>LOC107984221</i>   |
| rs2506108  | 35585711            | Non-coding transcript variant    | <i>LOC107984221</i>   |
| rs2506109  | 35584717            | Non-coding transcript variant    | <i>LOC107984221</i>   |
| rs2506110  | 35584461            | Non-coding transcript variant    | <i>LOC107984221</i>   |
| rs56668170 | 35337642            | Non-coding transcript variant    | <i>CCNY</i>           |
| Chr 11     |                     |                                  |                       |
| rs11603873 | 15075456            | Intron variant                   | <i>CALCB</i>          |
| rs58858617 | 15076171            | Intron variant                   | <i>CALCB</i>          |

|            |           |                            |                                            |
|------------|-----------|----------------------------|--------------------------------------------|
| rs16938342 | 45684744  | Intergenic variant         | None                                       |
| rs2237898  | 2842590   | Intron variant             | <i>KCNQ1 and KCNQ1-AS1</i>                 |
| rs3758768  | 128803284 | Intron variant             | <i>FLI1</i>                                |
| rs4909953  | 10798837  | Intron variant             | <i>EIF4G2</i>                              |
| Chr 12     |           |                            |                                            |
| rs12318758 | 54433784  | Intron variant             | <i>LOC102724050</i>                        |
| rs12829836 | 62828365  | Intron variant             | <i>PPM1H</i>                               |
| rs12831974 | 72330254  | Intron variant             | <i>TRHDE</i>                               |
| rs2555296  | 119216510 | Intron variant             | <i>LOC105370026</i>                        |
| rs874619   | 130448207 | Intron variant             | <i>RIMBP2</i>                              |
| Chr 13     |           |                            |                                            |
| rs11841001 | 75674967  | Intron variant             | <i>LMO7</i>                                |
| rs11841544 | 75687060  | Intron variant             | <i>LMO7</i>                                |
| rs1414320  | 109882745 | Intergenic variant         | None                                       |
| Chr 14     |           |                            |                                            |
| rs17109084 | 71153222  | Intergenic variant         | None                                       |
| rs17175304 | 79877374  | Intron variant             | <i>LOC105370582</i>                        |
| rs1775671  | 86837576  | Intergenic variant         | None                                       |
| Chr 15     |           |                            |                                            |
| rs12148293 | 82097824  | Downstream; intron variant | <i>LINC01583 and LOC105370924</i>          |
| Chr 16     |           |                            |                                            |
| rs1552273  | 85417119  | Intron variant             | <i>GSE1</i>                                |
| rs2549732  | 80827779  | Intergenic variant         | None                                       |
| rs258160   | 63780910  | Intergenic variant         | None                                       |
| rs8049897  | 89957794  | Intron variant             | <i>DEF8</i>                                |
| Chr 17     |           |                            |                                            |
| rs11867392 | 2018522   | Intron variant             | <i>RTN4RL1. LOC105371485. LOC105371486</i> |
| rs12938678 | 29383409  | Intergenic variant         | None                                       |
| rs3744761  | 45118646  | Intron variant             | <i>PLCD3</i>                               |
| rs9901525  | 6191015   | Upstream variant           | <i>LOC105371508</i>                        |
| Chr 18     |           |                            |                                            |
| rs17082725 | 70506308  | Intergenic variant         | <i>LOC105376872</i>                        |
| Chr 19     |           |                            |                                            |
| rs10426583 | 4650006   | Intron variant             | <i>TNFAIP8L</i>                            |
| Chr 20     |           |                            |                                            |
| rs17329208 | 53041791  | Intron variant             | <i>TSHZ2</i>                               |
| rs6032180  | 45428246  | Intron variant             | <i>LOC105372631</i>                        |
| rs6037397  | 2774414   | Intergenic variant         | None                                       |
| rs6048171  | 22534857  | Intergenic variant         | None                                       |
| rs6118390  | 8938100   | Intergenic variant         | None                                       |
| rs731428   | 52943621  | Intergenic variant         | None                                       |
| Chr 21     |           |                            |                                            |
| rs2837461  | 40150682  | Intron variant             | <i>DSCAM</i>                               |



rs3788061

43171012

Intron variant

*CRYAA and LOC107987300*

---

\* UTR: untranslated region

Supplemental Table IV: Significant gene-smoking interaction results\* after Bonferroni adjustment for multiple testing in relation to C-IMT<sub>max</sub> with cut-off at 75<sup>th</sup> percentile. A dominant genetic model was assumed†. Results presented are limited to those produced from analyzes where the minimum number of 10 subjects has not been achieved‡.

|             | Number of observations               |       |                                   |       |                                  |       |                               |       | Odds Ratio (95% Confidence Interval) <sup>  </sup>    |         |                                   |                                  |                               |                         |
|-------------|--------------------------------------|-------|-----------------------------------|-------|----------------------------------|-------|-------------------------------|-------|-------------------------------------------------------|---------|-----------------------------------|----------------------------------|-------------------------------|-------------------------|
|             | Non-smokers without the risk variant |       | Non-smokers with the risk variant |       | Smokers without the risk variant |       | Smokers with the risk variant |       | Reference group: Non-smokers without the risk variant |         |                                   |                                  |                               |                         |
|             | Controls                             | Cases | Controls                          | Cases | Controls                         | Cases | Controls                      | Cases | Risk allele                                           | MAF (%) | Non-smokers with the risk variant | Smokers without the risk variant | Smokers with the risk variant | p Synergy index         |
| Chr 1       |                                      |       |                                   |       |                                  |       |                               |       |                                                       |         |                                   |                                  |                               |                         |
| rs11208756  | 1922                                 | 614   | 17                                | 5     | 334                              | 155   | 1                             | 2     | T                                                     | 8       | 1(0.36;2.77)                      | 1.69(1.35;2.11)                  | 10.07(0.89;113.87)            | 1.39x10 <sup>-16</sup>  |
| rs11578418  | 1923                                 | 613   | 16                                | 6     | 334                              | 153   | 1                             | 4     | G                                                     | 10      | 1.22(0.46;3.23)                   | 1.67(1.34;2.09)                  | 12.28(1.34;112.86)            | 7.11x10 <sup>-19</sup>  |
| rs11804222  | 1920                                 | 613   | 19                                | 6     | 334                              | 153   | 1                             | 4     | G                                                     | 9       | 1.01(0.39;2.62)                   | 1.67(1.34;2.09)                  | 11.48(1.24;106.18)            | 9.53x10 <sup>-26</sup>  |
| rs17371694  | 1899                                 | 604   | 40                                | 15    | 332                              | 150   | 3                             | 7     | C                                                     | 14      | 1.26(0.68;2.33)                   | 1.65(1.32;2.07)                  | 9.26(2.29;37.52)              | 1.69x10 <sup>-22</sup>  |
| rs17602729  | 1911                                 | 607   | 28                                | 12    | 331                              | 148   | 4                             | 9     | G                                                     | 13      | 1.31(0.65;2.63)                   | 1.63(1.3;2.04)                   | 9.4(2.82;31.4)                | 5.62x10 <sup>-25</sup>  |
| rs76000797  | 1902                                 | 607   | 37                                | 12    | 333                              | 153   | 2                             | 4     | C                                                     | 14      | 1.16(0.59;2.28)                   | 1.67(1.34;2.09)                  | 9.89(1.76;55.58)              | 1.01x10 <sup>-21</sup>  |
| Chr 2       |                                      |       |                                   |       |                                  |       |                               |       |                                                       |         |                                   |                                  |                               |                         |
| rs113407226 | 1918                                 | 610   | 21                                | 9     | 334                              | 153   | 1                             | 4     | G                                                     | 11      | 1.39(0.62;3.13)                   | 1.67(1.34;2.09)                  | 14.81(1.64;133.61)            | 1.77x10 <sup>-22</sup>  |
| rs1598279   | 1919                                 | 613   | 20                                | 6     | 334                              | 155   | 1                             | 2     | T                                                     | 10      | 1.14(0.45;2.89)                   | 1.69(1.35;2.11)                  | 12.99(1.12;150.16)            | 1.13x10 <sup>-21</sup>  |
| rs17594260  | 1913                                 | 610   | 24                                | 9     | 332                              | 152   | 2                             | 5     | C                                                     | 9       | 1.02(0.46;2.23)                   | 1.67(1.33;2.09)                  | 7.77(1.45;41.69)              | 5.319x10 <sup>-17</sup> |
| rs2300963   | 1917                                 | 612   | 20                                | 7     | 334                              | 154   | 1                             | 3     | T                                                     | 10      | 1.06(0.44;2.56)                   | 1.68(1.35;2.1)                   | 10.6(1.02;109.98)             | 3.06x10 <sup>-18</sup>  |
| Chr 3       |                                      |       |                                   |       |                                  |       |                               |       |                                                       |         |                                   |                                  |                               |                         |
| rs10433607  | 1902                                 | 608   | 37                                | 11    | 333                              | 153   | 2                             | 4     | G                                                     | 13      | 1.17(0.58;2.33)                   | 1.68(1.34;2.1)                   | 8.42(1.48;47.92)              | 1.05x10 <sup>-14</sup>  |
| rs13320534  | 1901                                 | 608   | 38                                | 11    | 333                              | 153   | 2                             | 4     | G                                                     | 13      | 1.13(0.57;2.24)                   | 1.68(1.34;2.1)                   | 8.41(1.48;47.88)              | 5.90x10 <sup>-16</sup>  |
| rs1497891   | 1882                                 | 599   | 57                                | 20    | 332                              | 148   | 3                             | 9     | C                                                     | 17      | 1.07(0.62;1.86)                   | 1.62(1.3;2.04)                   | 11.99(3.14;45.75)             | 1.34x10 <sup>-69</sup>  |
| rs16849578  | 1914                                 | 610   | 25                                | 9     | 334                              | 154   | 1                             | 3     | T                                                     | 11      | 1.14(0.52;2.49)                   | 1.68(1.35;2.1)                   | 11.59(1.18;114.21)            | 4.94x10 <sup>-20</sup>  |
| rs2133007   | 1879                                 | 599   | 60                                | 20    | 330                              | 148   | 4                             | 9     | T                                                     | 18      | 1.01(0.58;1.74)                   | 1.63(1.3;2.04)                   | 9.02(2.69;30.23)              | 8.09x10 <sup>-48</sup>  |
| rs2713621   | 1888                                 | 601   | 51                                | 18    | 329                              | 150   | 6                             | 7     | G                                                     | 15      | 1.15(0.65;2.01)                   | 1.66(1.32;2.07)                  | 6.18(1.92;19.86)              | 2.83x10 <sup>-14</sup>  |
| rs904241    | 1880                                 | 599   | 59                                | 20    | 332                              | 148   | 3                             | 9     | A                                                     | 18      | 1.02(0.59;1.76)                   | 1.62(1.29;2.03)                  | 11.97(3.14;45.68)             | 1.26x10 <sup>-78</sup>  |
| rs9845228   | 1900                                 | 607   | 39                                | 12    | 332                              | 152   | 2                             | 5     | G                                                     | 13      | 1.01(0.52;1.99)                   | 1.67(1.34;2.09)                  | 6.78(1.26;36.43)              | 3.16x10 <sup>-13</sup>  |
| Chr 5       |                                      |       |                                   |       |                                  |       |                               |       |                                                       |         |                                   |                                  |                               |                         |
| rs10043169  | 1904                                 | 608   | 21                                | 7     | 332                              | 150   | 1                             | 4     | A                                                     | 10      | 1.1(0.46;2.64)                    | 1.65(1.31;2.06)                  | 13.33(1.46;121.58)            | 5.43x10 <sup>-32</sup>  |
| rs10512634  | 1908                                 | 605   | 31                                | 14    | 333                              | 153   | 2                             | 4     | G                                                     | 13      | 1.3(0.67;2.52)                    | 1.68(1.34;2.1)                   | 14.55(1.59;133.3)             | 1.81x10 <sup>-26</sup>  |
| rs10515808  | 1916                                 | 610   | 23                                | 9     | 334                              | 153   | 1                             | 4     | C                                                     | 10      | 1.34(0.6;2.95)                    | 1.68(1.34;2.1)                   | 13.37(1.46;121.97)            | 8.76x10 <sup>-20</sup>  |
| rs12522290  | 1890                                 | 602   | 49                                | 17    | 331                              | 151   | 4                             | 6     | C                                                     | 15      | 1(0.56;1.8)                       | 1.66(1.32;2.08)                  | 5.85(1.57;21.78)              | 3.15x10 <sup>-14</sup>  |
| rs1347118   | 1923                                 | 614   | 16                                | 5     | 334                              | 154   | 1                             | 3     | G                                                     | 9       | 1.01(0.36;2.88)                   | 1.68(1.34;2.1)                   | 11.62(1.2;112.24)             | 2.96x10 <sup>-24</sup>  |
| rs295044    | 1870                                 | 597   | 66                                | 22    | 329                              | 150   | 5                             | 7     | C                                                     | 18      | 1.06(0.64;1.75)                   | 1.66(1.32;2.07)                  | 6.42(1.83;22.56)              | 9.03x10 <sup>-18</sup>  |
| rs400196    | 1914                                 | 610   | 25                                | 9     | 333                              | 153   | 2                             | 4     | G                                                     | 11      | 1.09(0.5;2.42)                    | 1.67(1.34;2.09)                  | 7.98(1.39;45.73)              | 2.56x10 <sup>-14</sup>  |
| rs4438916   | 1915                                 | 610   | 24                                | 9     | 334                              | 153   | 1                             | 4     | G                                                     | 10      | 1.26(0.57;2.76)                   | 1.68(1.34;2.09)                  | 13.35(1.46;121.81)            | 8.57x10 <sup>-23</sup>  |
| rs72814378  | 1916                                 | 610   | 23                                | 9     | 334                              | 153   | 1                             | 4     | A                                                     | 10      | 1.34(0.6;2.95)                    | 1.68(1.34;2.1)                   | 13.37(1.46;121.97)            | 8.76x10 <sup>-20</sup>  |

|             |      |     |    |    |     |     |   |    |   |    |                 |                 |                    |            |
|-------------|------|-----|----|----|-----|-----|---|----|---|----|-----------------|-----------------|--------------------|------------|
| rs79791419  | 1915 | 610 | 24 | 9  | 334 | 153 | 1 | 4  | A | 10 | 1.26(0.57;2.76) | 1.68(1.34;2.09) | 13.35(1.46;121.81) | 8.57x10-23 |
| Chr 6       |      |     |    |    |     |     |   |    |   |    |                 |                 |                    |            |
| rs111663960 | 1910 | 609 | 29 | 10 | 334 | 154 | 1 | 3  | A | 12 | 1.26(0.59;2.68) | 1.69(1.35;2.11) | 12.86(1.29;127.77) | 1.01x10-19 |
| rs113600760 | 1908 | 609 | 31 | 10 | 333 | 151 | 2 | 6  | C | 12 | 1.05(0.5;2.18)  | 1.65(1.32;2.07) | 9.28(1.84;46.67)   | 1.95x10-26 |
| rs12199718  | 1913 | 611 | 26 | 8  | 334 | 154 | 1 | 3  | C | 10 | 1.04(0.46;2.34) | 1.68(1.34;2.1)  | 12.63(1.29;123.92) | 6.65x10-30 |
| rs1266071   | 1920 | 612 | 19 | 7  | 334 | 154 | 1 | 3  | C | 10 | 1.07(0.44;2.63) | 1.68(1.34;2.1)  | 9.89(0.99;98.57)   | 1.51x10-15 |
| rs190761    | 1908 | 609 | 31 | 10 | 333 | 151 | 2 | 6  | C | 12 | 1.05(0.5;2.18)  | 1.65(1.32;2.07) | 9.28(1.84;46.67)   | 1.95x10-26 |
| rs512685    | 1893 | 604 | 40 | 14 | 330 | 149 | 4 | 8  | G | 14 | 1.1(0.58;2.05)  | 1.64(1.31;2.06) | 7.55(2.24;25.48)   | 1.83x10-23 |
| rs557411    | 1908 | 609 | 31 | 10 | 333 | 151 | 2 | 6  | T | 12 | 1.05(0.5;2.18)  | 1.65(1.32;2.07) | 9.28(1.84;46.67)   | 1.95x10-26 |
| rs576899    | 1908 | 609 | 31 | 10 | 333 | 151 | 2 | 6  | G | 12 | 1.05(0.5;2.18)  | 1.65(1.32;2.07) | 9.28(1.84;46.67)   | 1.95x10-26 |
| rs579544    | 1908 | 609 | 31 | 10 | 333 | 151 | 2 | 6  | A | 12 | 1.05(0.5;2.18)  | 1.65(1.32;2.07) | 9.28(1.84;46.67)   | 1.95x10-26 |
| rs6940832   | 1908 | 609 | 31 | 10 | 333 | 151 | 2 | 6  | G | 12 | 1.05(0.5;2.18)  | 1.65(1.32;2.07) | 9.28(1.84;46.67)   | 1.95x10-26 |
| rs707974    | 1921 | 612 | 18 | 7  | 334 | 154 | 1 | 3  | A | 10 | 1.15(0.46;2.84) | 1.68(1.35;2.1)  | 9.9(0.99;98.64)    | 3.16x10-13 |
| rs72832602  | 1910 | 607 | 28 | 12 | 334 | 154 | 1 | 3  | T | 12 | 1.54(0.76;3.14) | 1.69(1.35;2.11) | 12.9(1.3;128.21)   | 9.89x10-13 |
| rs72834621  | 1910 | 608 | 28 | 11 | 334 | 154 | 1 | 3  | A | 12 | 1.45(0.69;3.02) | 1.69(1.35;2.11) | 12.88(1.3;127.99)  | 1.66x10-14 |
| rs72834627  | 1912 | 608 | 27 | 11 | 334 | 154 | 1 | 3  | G | 12 | 1.52(0.72;3.19) | 1.69(1.35;2.11) | 12.9(1.3;128.16)   | 5.59x10-13 |
| rs72834643  | 1911 | 608 | 28 | 11 | 334 | 154 | 1 | 3  | C | 12 | 1.45(0.7;3.04)  | 1.69(1.35;2.11) | 12.89(1.3;128.09)  | 2.50x10-14 |
| rs72834647  | 1911 | 608 | 28 | 11 | 334 | 154 | 1 | 3  | G | 12 | 1.45(0.7;3.04)  | 1.69(1.35;2.11) | 12.89(1.3;128.09)  | 2.51x10-14 |
| rs7766267   | 1909 | 607 | 29 | 12 | 334 | 154 | 1 | 3  | G | 12 | 1.54(0.76;3.14) | 1.69(1.35;2.11) | 12.9(1.3;128.18)   | 1.00x10-12 |
| rs78227802  | 1908 | 609 | 31 | 10 | 333 | 151 | 2 | 6  | C | 12 | 1.05(0.5;2.18)  | 1.65(1.32;2.07) | 9.28(1.84;46.67)   | 1.95x10-26 |
| rs9477109   | 1915 | 611 | 24 | 8  | 332 | 154 | 2 | 3  | A | 11 | 1.14(0.5;2.57)  | 1.69(1.35;2.11) | 11.48(1.16;113.77) | 4.12x10-19 |
| rs9482260   | 1887 | 597 | 52 | 22 | 334 | 154 | 1 | 3  | G | 15 | 1.48(0.88;2.5)  | 1.7(1.36;2.13)  | 12.87(1.32;125.87) | 2.03x10-14 |
| rs9487678   | 1927 | 615 | 12 | 4  | 334 | 155 | 1 | 2  | G | 8  | 1.08(0.34;3.43) | 1.69(1.35;2.11) | 10.01(0.89;112.49) | 4.81x10-13 |
| Chr 7       |      |     |    |    |     |     |   |    |   |    |                 |                 |                    |            |
| rs10256347  | 1912 | 608 | 27 | 11 | 333 | 153 | 2 | 4  | C | 12 | 1.22(0.6;2.52)  | 1.68(1.34;2.1)  | 8.47(1.42;50.56)   | 1.08x10-12 |
| rs16868830  | 1917 | 610 | 22 | 9  | 334 | 154 | 1 | 3  | T | 9  | 1.15(0.5;2.64)  | 1.68(1.34;2.1)  | 12.4(1.2;127.83)   | 2.22x10-21 |
| rs2191886   | 1914 | 609 | 25 | 10 | 333 | 152 | 2 | 5  | C | 11 | 1.26(0.59;2.68) | 1.66(1.33;2.08) | 10.06(1.89;53.43)  | 3.77x10-19 |
| rs2271032   | 1893 | 604 | 46 | 15 | 332 | 152 | 3 | 5  | A | 15 | 1.06(0.58;1.95) | 1.67(1.33;2.09) | 6.5(1.53;27.58)    | 9.17x10-14 |
| Chr 8       |      |     |    |    |     |     |   |    |   |    |                 |                 |                    |            |
| rs10091991  | 1909 | 608 | 29 | 11 | 334 | 152 | 1 | 5  | G | 12 | 1.56(0.75;3.26) | 1.67(1.33;2.09) | 21.43(2.46;186.9)  | 8.31x10-40 |
| rs17778118  | 1921 | 612 | 18 | 7  | 333 | 150 | 2 | 7  | A | 10 | 1.31(0.53;3.21) | 1.64(1.31;2.06) | 11.97(2.43;58.94)  | 1.55x10-25 |
| Chr 9       |      |     |    |    |     |     |   |    |   |    |                 |                 |                    |            |
| rs12380395  | 1887 | 602 | 52 | 17 | 328 | 147 | 7 | 10 | C | 17 | 1.01(0.57;1.78) | 1.63(1.3;2.04)  | 5.85(2.15;15.92)   | 1.10x10-20 |
| Chr 10      |      |     |    |    |     |     |   |    |   |    |                 |                 |                    |            |
| rs10887807  | 1903 | 605 | 36 | 14 | 332 | 150 | 3 | 7  | T | 12 | 1.32(0.7;2.51)  | 1.65(1.32;2.07) | 8.75(2.19;34.93)   | 1.12x10-17 |
| rs10905959  | 1913 | 609 | 26 | 10 | 333 | 152 | 2 | 5  | C | 11 | 1.3(0.61;2.75)  | 1.66(1.33;2.08) | 20.63(2.35;181.01) | 3.89x10-57 |
| rs11202726  | 1898 | 605 | 41 | 14 | 331 | 149 | 4 | 8  | A | 13 | 1.1(0.59;2.07)  | 1.64(1.31;2.05) | 8.19(2.39;28.12)   | 1.50x10-27 |
| rs11598623  | 1898 | 605 | 41 | 14 | 331 | 149 | 4 | 8  | A | 13 | 1.1(0.59;2.07)  | 1.64(1.31;2.05) | 8.19(2.39;28.12)   | 1.50x10-27 |
| rs12356363  | 1911 | 609 | 28 | 10 | 330 | 149 | 5 | 8  | C | 12 | 1.02(0.47;2.21) | 1.64(1.31;2.06) | 6.09(1.95;18.98)   | 1.36x10-15 |
| rs12411339  | 1916 | 611 | 23 | 8  | 334 | 154 | 1 | 3  | C | 11 | 1.06(0.46;2.42) | 1.68(1.35;2.1)  | 9.1(0.91;90.85)    | 9.47x10-14 |
| rs1571026   | 1906 | 609 | 33 | 10 | 334 | 154 | 1 | 3  | T | 12 | 1.02(0.49;2.12) | 1.68(1.35;2.11) | 8.94(0.87;91.55)   | 1.69x10-14 |
| rs2274356   | 1907 | 609 | 32 | 10 | 334 | 154 | 1 | 3  | A | 12 | 1.08(0.52;2.24) | 1.69(1.35;2.11) | 8.95(0.87;91.63)   | 8.11x10-13 |
| rs4457667   | 1912 | 608 | 27 | 11 | 334 | 154 | 1 | 3  | C | 10 | 1.24(0.59;2.62) | 1.68(1.35;2.1)  | 16.49(1.68;162.19) | 2.33x10-35 |

|            |      |     |     |    |     |     |   |    |   |    |                 |                 |                    |            |
|------------|------|-----|-----|----|-----|-----|---|----|---|----|-----------------|-----------------|--------------------|------------|
| rs74149704 | 1898 | 605 | 41  | 14 | 331 | 149 | 4 | 8  | A | 13 | 1.1(0.59;2.07)  | 1.64(1.31;2.05) | 8.19(2.39;28.12)   | 1.50x10-27 |
| rs963244   | 1915 | 611 | 24  | 8  | 334 | 154 | 1 | 3  | A | 11 | 1.09(0.48;2.49) | 1.68(1.35;2.1)  | 9.86(1.00;97.65)   | 2.27x10-15 |
| Chr 11     |      |     |     |    |     |     |   |    |   |    |                 |                 |                    |            |
| rs10082672 | 1875 | 598 | 63  | 21 | 328 | 146 | 7 | 11 | T | 19 | 1.04(0.62;1.74) | 1.61(1.28;2.02) | 6.55(2.44;17.58)   | 1.02x10-27 |
| rs10082701 | 1876 | 598 | 63  | 21 | 328 | 146 | 7 | 11 | C | 19 | 1.04(0.62;1.74) | 1.61(1.29;2.03) | 6.56(2.44;17.59)   | 1.12x10-27 |
| rs11214260 | 1894 | 606 | 45  | 13 | 334 | 153 | 1 | 4  | G | 14 | 1.05(0.56;1.99) | 1.67(1.34;2.09) | 14.97(1.65;136.2)  | 1.69x10-48 |
| rs11232958 | 1903 | 603 | 36  | 15 | 333 | 151 | 2 | 6  | C | 14 | 1.41(0.75;2.64) | 1.66(1.33;2.08) | 13.61(2.68;69.04)  | 4.20x10-32 |
| rs11232966 | 1903 | 604 | 36  | 15 | 333 | 151 | 2 | 6  | A | 14 | 1.4(0.75;2.63)  | 1.66(1.33;2.08) | 13.59(2.68;68.96)  | 3.56x10-32 |
| rs11246161 | 1892 | 604 | 47  | 15 | 333 | 152 | 2 | 5  | C | 13 | 1.01(0.55;1.85) | 1.66(1.33;2.07) | 11.25(2.15;58.90)  | 2.66x10-46 |
| rs11820515 | 1903 | 604 | 36  | 15 | 333 | 151 | 2 | 6  | G | 14 | 1.4(0.75;2.63)  | 1.66(1.33;2.08) | 13.59(2.68;68.96)  | 3.56x10-32 |
| rs11827684 | 1902 | 604 | 36  | 15 | 333 | 151 | 2 | 6  | A | 14 | 1.4(0.75;2.63)  | 1.66(1.33;2.08) | 13.58(2.68;68.92)  | 3.43x10-32 |
| rs11827708 | 1903 | 604 | 36  | 15 | 332 | 151 | 2 | 6  | A | 14 | 1.4(0.75;2.63)  | 1.67(1.33;2.09) | 13.59(2.68;68.95)  | 6.81x10-32 |
| rs2919706  | 1903 | 604 | 36  | 15 | 333 | 150 | 2 | 7  | G | 14 | 1.41(0.75;2.64) | 1.65(1.32;2.06) | 16.48(3.35;81.03)  | 4.32x10-51 |
| rs2919707  | 1903 | 604 | 36  | 15 | 333 | 151 | 2 | 6  | C | 14 | 1.4(0.75;2.63)  | 1.66(1.33;2.08) | 13.59(2.68;68.96)  | 3.56x10-32 |
| rs2919708  | 1903 | 604 | 36  | 15 | 333 | 151 | 2 | 6  | A | 14 | 1.4(0.75;2.63)  | 1.66(1.33;2.08) | 13.59(2.68;68.96)  | 3.56x10-32 |
| rs2919710  | 1903 | 604 | 36  | 15 | 333 | 151 | 2 | 6  | G | 14 | 1.4(0.75;2.63)  | 1.66(1.33;2.08) | 13.59(2.68;68.96)  | 3.56x10-32 |
| rs2919713  | 1903 | 604 | 36  | 15 | 333 | 151 | 2 | 6  | T | 14 | 1.4(0.75;2.63)  | 1.66(1.33;2.08) | 13.59(2.68;68.96)  | 3.56x10-32 |
| rs2919718  | 1903 | 604 | 36  | 15 | 333 | 151 | 2 | 6  | C | 14 | 1.4(0.75;2.63)  | 1.66(1.33;2.08) | 13.59(2.68;68.96)  | 3.56x10-32 |
| rs3020039  | 1903 | 604 | 36  | 15 | 333 | 151 | 2 | 6  | T | 14 | 1.4(0.75;2.63)  | 1.66(1.33;2.08) | 13.59(2.68;68.96)  | 3.56x10-32 |
| rs3020044  | 1903 | 604 | 36  | 15 | 333 | 151 | 2 | 6  | G | 14 | 1.4(0.75;2.63)  | 1.66(1.33;2.08) | 13.59(2.68;68.96)  | 3.56x10-32 |
| rs4284411  | 1903 | 604 | 35  | 15 | 333 | 151 | 2 | 6  | T | 14 | 1.42(0.76;2.68) | 1.66(1.33;2.08) | 13.59(2.68;68.94)  | 3.92x10-31 |
| rs963167   | 1910 | 605 | 29  | 14 | 333 | 150 | 2 | 7  | G | 14 | 1.39(0.71;2.70) | 1.65(1.32;2.07) | 14.03(2.84;69.32)  | 3.77x10-36 |
| Chr 12     |      |     |     |    |     |     |   |    |   |    |                 |                 |                    |            |
| rs1040213  | 1924 | 614 | 15  | 5  | 333 | 153 | 2 | 4  | T | 8  | 1.02(0.36;2.89) | 1.67(1.34;2.09) | 7.69(1.38;42.87)   | 1.40x10-13 |
| rs10505859 | 1850 | 590 | 89  | 29 | 329 | 148 | 6 | 9  | G | 19 | 1.07(0.69;1.65) | 1.63(1.30;2.05) | 6.77(2.33;19.73)   | 6.11x10-27 |
| rs10851044 | 1921 | 613 | 18  | 6  | 333 | 152 | 2 | 5  | A | 10 | 1.18(0.46;3.05) | 1.66(1.33;2.08) | 10.35(1.94;55.32)  | 6.91x10-21 |
| rs11169949 | 1830 | 582 | 109 | 37 | 328 | 147 | 6 | 10 | T | 23 | 1.04(0.70;1.55) | 1.64(1.30;2.05) | 6.14(2.14;17.59)   | 1.80x10-23 |
| rs12371260 | 1920 | 613 | 18  | 6  | 333 | 152 | 2 | 5  | A | 10 | 1.18(0.46;3.04) | 1.66(1.33;2.08) | 10.35(1.94;55.31)  | 5.88x10-21 |
| rs1468624  | 1881 | 597 | 58  | 22 | 333 | 153 | 1 | 4  | G | 16 | 1.16(0.69;1.93) | 1.68(1.34;2.10) | 13.77(1.46;129.53) | 1.11x10-31 |
| rs1718302  | 1892 | 605 | 47  | 14 | 329 | 150 | 6 | 7  | A | 15 | 1.08(0.58;2.00) | 1.65(1.32;2.07) | 6.34(1.95;20.62)   | 1.50x10-16 |
| rs632151   | 1904 | 606 | 35  | 13 | 333 | 153 | 2 | 4  | G | 12 | 1.18(0.61;2.28) | 1.68(1.34;2.10) | 8.38(1.51;46.59)   | 1.01x10-14 |
| Chr 13     |      |     |     |    |     |     |   |    |   |    |                 |                 |                    |            |
| rs4771411  | 1917 | 614 | 12  | 4  | 332 | 152 | 1 | 5  | A | 9  | 1.1(0.34;3.59)  | 1.67(1.33;2.08) | 16.41(1.87;143.78) | 1.12x10-41 |
| Chr14      |      |     |     |    |     |     |   |    |   |    |                 |                 |                    |            |
| rs709932   | 1883 | 599 | 56  | 20 | 333 | 152 | 2 | 5  | C | 16 | 1.15(0.68;1.96) | 1.67(1.34;2.09) | 8.33(1.53;45.22)   | 1.42x10-16 |
| Chr 15     |      |     |     |    |     |     |   |    |   |    |                 |                 |                    |            |
| rs12899074 | 1920 | 612 | 19  | 7  | 334 | 154 | 1 | 3  | G | 9  | 1.12(0.46;2.71) | 1.68(1.34;2.09) | 13.74(1.36;138.67) | 6.25x10-29 |
| rs12899456 | 1889 | 602 | 50  | 17 | 332 | 151 | 3 | 6  | A | 14 | 1.15(0.65;2.04) | 1.66(1.33;2.08) | 7.63(1.81;32.28)   | 2.52x10-17 |
| rs12899581 | 1920 | 612 | 19  | 7  | 334 | 154 | 1 | 3  | A | 9  | 1.12(0.46;2.71) | 1.68(1.34;2.09) | 13.74(1.36;138.67) | 6.25x10-29 |
| rs12905302 | 1888 | 602 | 50  | 17 | 331 | 151 | 3 | 6  | G | 14 | 1.15(0.65;2.04) | 1.67(1.33;2.09) | 7.63(1.81;32.27)   | 3.40x10-17 |
| rs12906675 | 1920 | 612 | 19  | 7  | 334 | 154 | 1 | 3  | G | 9  | 1.12(0.46;2.71) | 1.68(1.34;2.09) | 13.74(1.36;138.67) | 6.25x10-29 |
| rs12907202 | 1917 | 611 | 19  | 7  | 334 | 154 | 1 | 3  | G | 9  | 1.12(0.46;2.71) | 1.67(1.34;2.09) | 13.74(1.36;138.66) | 4.50x10-29 |
| rs12907472 | 1920 | 612 | 19  | 7  | 334 | 154 | 1 | 3  | G | 9  | 1.12(0.46;2.71) | 1.68(1.34;2.09) | 13.74(1.36;138.67) | 6.25x10-29 |

|             |      |     |    |    |     |     |   |    |   |    |                 |                 |                    |            |
|-------------|------|-----|----|----|-----|-----|---|----|---|----|-----------------|-----------------|--------------------|------------|
| rs12907922  | 1920 | 612 | 19 | 7  | 334 | 154 | 1 | 3  | A | 9  | 1.12(0.46;2.71) | 1.68(1.34;2.09) | 13.74(1.36;138.67) | 6.25x10-29 |
| rs12916113  | 1919 | 612 | 20 | 7  | 334 | 154 | 1 | 3  | A | 9  | 1.09(0.45;2.64) | 1.68(1.34;2.09) | 13.73(1.36;138.64) | 1.88x10-30 |
| rs12916122  | 1919 | 612 | 20 | 7  | 334 | 154 | 1 | 3  | T | 9  | 1.09(0.45;2.64) | 1.68(1.34;2.09) | 13.73(1.36;138.64) | 1.88x10-30 |
| rs16968518  | 1916 | 610 | 23 | 9  | 334 | 154 | 1 | 3  | T | 13 | 1.42(0.64;3.15) | 1.69(1.35;2.11) | 12.29(1.25;121.05) | 1.72x10-13 |
| rs181447504 | 1888 | 602 | 50 | 17 | 332 | 151 | 3 | 6  | C | 14 | 1.15(0.65;2.04) | 1.66(1.33;2.08) | 7.63(1.8;32.25)    | 2.40x10-17 |
| rs2928138   | 1920 | 612 | 19 | 7  | 334 | 154 | 1 | 3  | T | 9  | 1.12(0.46;2.71) | 1.68(1.34;2.09) | 13.74(1.36;138.67) | 6.25x10-29 |
| rs34073905  | 1879 | 599 | 60 | 20 | 333 | 152 | 2 | 5  | G | 16 | 1.12(0.66;1.89) | 1.67(1.33;2.09) | 9.8(1.78;53.87)    | 7.24x10-26 |
| rs34359839  | 1890 | 599 | 49 | 20 | 331 | 149 | 4 | 8  | A | 16 | 1.36(0.79;2.35) | 1.65(1.32;2.07) | 8.04(2.32;27.92)   | 6.28x10-17 |
| rs35396991  | 1889 | 602 | 50 | 17 | 332 | 151 | 3 | 6  | A | 14 | 1.15(0.65;2.04) | 1.66(1.33;2.08) | 7.63(1.81;32.28)   | 2.52x10-17 |
| rs531366    | 1920 | 612 | 19 | 7  | 334 | 154 | 1 | 3  | G | 9  | 1.12(0.46;2.71) | 1.68(1.34;2.09) | 13.74(1.36;138.67) | 6.24x10-29 |
| rs540257    | 1920 | 612 | 19 | 7  | 334 | 154 | 1 | 3  | T | 9  | 1.12(0.46;2.71) | 1.68(1.34;2.09) | 13.74(1.36;138.67) | 6.24x10-29 |
| rs600724    | 1903 | 608 | 19 | 7  | 331 | 154 | 1 | 3  | C | 9  | 1.12(0.46;2.71) | 1.68(1.34;2.10) | 13.7(1.36;138.07)  | 1.02x10-28 |
| rs615835    | 1920 | 611 | 19 | 7  | 334 | 154 | 1 | 3  | A | 9  | 1.12(0.46;2.71) | 1.68(1.34;2.10) | 13.78(1.37;139.09) | 6.27x10-29 |
| rs623722    | 1920 | 611 | 19 | 7  | 334 | 154 | 1 | 3  | T | 9  | 1.12(0.46;2.71) | 1.68(1.34;2.10) | 13.78(1.37;139.09) | 6.27x10-29 |
| rs6495133   | 1857 | 591 | 82 | 28 | 327 | 146 | 8 | 11 | C | 20 | 1.14(0.73;1.80) | 1.63(1.30;2.05) | 5.08(1.98;13.07)   | 3.79x10-13 |
| rs687549    | 1920 | 612 | 19 | 7  | 334 | 154 | 1 | 3  | A | 9  | 1.12(0.46;2.71) | 1.68(1.34;2.09) | 13.74(1.36;138.67) | 6.24x10-29 |
| rs71401605  | 1890 | 600 | 49 | 19 | 331 | 150 | 4 | 7  | G | 16 | 1.3(0.75;2.27)  | 1.66(1.33;2.08) | 7.24(2.02;25.98)   | 6.75x10-14 |
| rs71401676  | 1889 | 602 | 50 | 17 | 332 | 151 | 3 | 6  | C | 15 | 1.15(0.65;2.04) | 1.66(1.33;2.08) | 7.63(1.81;32.28)   | 2.52x10-17 |
| rs7173321   | 1919 | 612 | 19 | 7  | 334 | 154 | 1 | 3  | C | 9  | 1.12(0.46;2.71) | 1.67(1.34;2.09) | 13.73(1.36;138.63) | 5.13x10-29 |
| rs75969957  | 1889 | 599 | 49 | 20 | 331 | 149 | 4 | 7  | A | 16 | 1.36(0.79;2.35) | 1.65(1.32;2.07) | 7.24(2.02;25.97)   | 6.65x10-13 |
| rs8033883   | 1857 | 591 | 82 | 28 | 327 | 146 | 8 | 11 | A | 20 | 1.14(0.73;1.8)  | 1.63(1.30;2.05) | 5.08(1.98;13.07)   | 3.79x10-13 |
| rs8038911   | 1889 | 601 | 50 | 18 | 332 | 151 | 3 | 6  | A | 14 | 1.22(0.69;2.14) | 1.66(1.33;2.08) | 7.65(1.81;32.34)   | 2.60x10-15 |
| Chr 16      |      |     |    |    |     |     |   |    |   |    |                 |                 |                    |            |
| rs12596139  | 1927 | 615 | 12 | 4  | 334 | 155 | 1 | 2  | G | 7  | 1.27(0.4;4.04)  | 1.69(1.35;2.11) | 12.89(1.12;147.88) | 2.90x10-15 |
| rs12933423  | 1908 | 608 | 30 | 11 | 332 | 154 | 2 | 3  | G | 12 | 1.08(0.53;2.19) | 1.69(1.35;2.11) | 7.8(1.26;48.43)    | 1.56x10-13 |
| rs16973748  | 1906 | 608 | 32 | 11 | 334 | 154 | 1 | 3  | G | 12 | 1.04(0.51;2.1)  | 1.68(1.34;2.1)  | 10.58(1.08;103.44) | 2.43x10-21 |
| rs1805007   | 1933 | 616 | 6  | 3  | 334 | 154 | 1 | 3  | C | 6  | 1.25(0.31;5.06) | 1.68(1.34;2.1)  | 13.33(1.35;131.91) | 1.03x10-16 |
| rs1863985   | 1892 | 606 | 29 | 11 | 329 | 149 | 2 | 4  | C | 12 | 1.25(0.61;2.58) | 1.65(1.32;2.07) | 8.59(1.52;48.64)   | 1.80x10-13 |
| rs7203264   | 1852 | 589 | 87 | 30 | 326 | 143 | 9 | 14 | G | 20 | 1.14(0.74;1.76) | 1.62(1.28;2.03) | 5.01(2.12;11.86)   | 7.12x10-15 |
| Chr 18      |      |     |    |    |     |     |   |    |   |    |                 |                 |                    |            |
| rs112812977 | 1901 | 606 | 37 | 13 | 334 | 153 | 1 | 4  | T | 13 | 1.11(0.58;2.14) | 1.67(1.34;2.09) | 13.36(1.44;124.41) | 5.32x10-32 |
| rs12607452  | 1923 | 614 | 16 | 5  | 334 | 154 | 1 | 3  | C | 8  | 1.08(0.39;3.04) | 1.68(1.34;2.1)  | 10.12(1.03;99.53)  | 2.58x10-15 |
| rs16978345  | 1923 | 614 | 16 | 5  | 334 | 154 | 1 | 3  | A | 8  | 1.08(0.39;3.04) | 1.68(1.34;2.1)  | 10.12(1.03;99.53)  | 2.58x10-15 |
| rs4605263   | 1909 | 608 | 22 | 9  | 333 | 153 | 1 | 3  | G | 11 | 1.32(0.59;2.93) | 1.69(1.35;2.11) | 16.32(1.57;169.44) | 6.16x10-28 |
| rs8097973   | 1911 | 607 | 28 | 12 | 330 | 149 | 5 | 8  | T | 13 | 1.44(0.71;2.9)  | 1.65(1.31;2.06) | 7.93(2.35;26.81)   | 1.71x10-13 |
| Chr 20      |      |     |    |    |     |     |   |    |   |    |                 |                 |                    |            |
| rs17092385  | 1912 | 610 | 27 | 9  | 333 | 152 | 2 | 5  | T | 11 | 1.05(0.48;2.28) | 1.66(1.33;2.08) | 9.44(1.78;50.16)   | 3.43x10-25 |
| rs73139727  | 1922 | 612 | 17 | 7  | 334 | 153 | 1 | 4  | T | 8  | 1.4(0.57;3.45)  | 1.67(1.34;2.09) | 19.02(2.1;172.06)  | 2.24x10-36 |
| Chr 21      |      |     |    |    |     |     |   |    |   |    |                 |                 |                    |            |
| rs2835673   | 1924 | 612 | 15 | 7  | 334 | 153 | 1 | 4  | C | 9  | 1.33(0.53;3.33) | 1.68(1.34;2.1)  | 12.46(1.33;116.77) | 3.57x10-16 |
| Chr 22      |      |     |    |    |     |     |   |    |   |    |                 |                 |                    |            |
| rs12170612  | 1904 | 607 | 35 | 12 | 333 | 153 | 2 | 4  | G | 12 | 1.09(0.55;2.13) | 1.67(1.34;2.09) | 8.3(1.43;48.38)    | 1.05x10-16 |
| rs9607434   | 1905 | 607 | 34 | 12 | 333 | 153 | 2 | 4  | G | 12 | 1.13(0.58;2.23) | 1.67(1.34;2.09) | 8.31(1.43;48.42)   | 4.16x10-15 |

MAF: minor allele frequency;

\* Synergy index results were considered significant at p-values  $<2.4 \times 10^{-7}$

† Individuals who carry either one or two copies of the risk allele are considered to carry the risk variant

‡ Results from observations where the number of subjects in any subgroup is 0 are not shown (n=268)

|| Model adjusted for sex, age, education (categorical), physical activity (categorical), Mediterranean diet score and population structure (MDS1-3 continuous)

Supplemental Table V: Significant gene-smoking interaction results\* after Bonferroni adjustment for multiple testing in relation to C-IMT<sub>max</sub> with cut-off at 50<sup>th</sup> percentile. A dominant genetic model was assumed<sup>†</sup>. Results presented are limited to those produced from analyzes where the minimum number of 10 subjects has not been achieved<sup>‡</sup>.

|            | Number of observations               |       |                                   |       |                                  |       |                               |       | Odds Ratio (95% Confidence Interval) <sup>  </sup> |         |                                                       |                                  |                               |                 |
|------------|--------------------------------------|-------|-----------------------------------|-------|----------------------------------|-------|-------------------------------|-------|----------------------------------------------------|---------|-------------------------------------------------------|----------------------------------|-------------------------------|-----------------|
|            | Non-smokers without the risk variant |       | Non-smokers with the risk variant |       | Smokers without the risk variant |       | Smokers with the risk variant |       | Risk allele                                        | MAF (%) | Reference group: Non-smokers without the risk variant |                                  |                               |                 |
|            | Controls                             | Cases | Controls                          | Cases | Controls                         | Cases | Controls                      | Cases |                                                    |         | Non-smokers with the risk variant                     | Smokers without the risk variant | Smokers with the risk variant | p Synergy index |
| Chr1       |                                      |       |                                   |       |                                  |       |                               |       |                                                    |         |                                                       |                                  |                               |                 |
| rs10889363 | 1267                                 | 1208  | 41                                | 42    | 196                              | 278   | 3                             | 15    | C                                                  | 17      | 1.15(0.73;1.82)                                       | 1.8(1.46;2.22)                   | 6.78(1.93;23.9)               | 1.91x10-13      |
| rs11208008 | 1267                                 | 1208  | 41                                | 42    | 196                              | 278   | 3                             | 15    | T                                                  | 17      | 1.15(0.73;1.82)                                       | 1.8(1.46;2.22)                   | 6.78(1.93;23.9)               | 1.91x10-13      |
| rs11208010 | 1267                                 | 1208  | 41                                | 42    | 196                              | 278   | 3                             | 15    | T                                                  | 17      | 1.15(0.73;1.81)                                       | 1.8(1.46;2.22)                   | 6.78(1.93;23.89)              | 1.61x10-13      |
| rs12130333 | 1267                                 | 1208  | 41                                | 42    | 196                              | 278   | 3                             | 15    | C                                                  | 17      | 1.15(0.73;1.82)                                       | 1.8(1.46;2.22)                   | 6.78(1.93;23.9)               | 1.91x10-13      |
| rs12566784 | 1292                                 | 1234  | 16                                | 16    | 198                              | 284   | 1                             | 9     | T                                                  | 11      | 1.13(0.55;2.31)                                       | 1.82(1.47;2.24)                  | 11.32(1.42;90.33)             | 4.30x10-18      |
| rs1336474  | 1259                                 | 1195  | 47                                | 55    | 198                              | 285   | 1                             | 8     | A                                                  | 20      | 1.22(0.8;1.84)                                        | 1.83(1.48;2.25)                  | 12.2(1.51;98.82)              | 3.62x10-19      |
| rs16840422 | 1284                                 | 1224  | 24                                | 26    | 198                              | 283   | 1                             | 10    | C                                                  | 14      | 1.16(0.65;2.07)                                       | 1.81(1.47;2.23)                  | 14.21(1.81;111.88)            | 7.30x10-30      |
| rs2818765  | 1282                                 | 1223  | 26                                | 27    | 197                              | 284   | 1                             | 9     | T                                                  | 13      | 1.06(0.61;1.87)                                       | 1.83(1.49;2.26)                  | 9.95(1.22;81.08)              | 1.57x10-15      |
| rs3766404  | 1283                                 | 1221  | 24                                | 26    | 198                              | 283   | 1                             | 10    | T                                                  | 14      | 1.16(0.65;2.07)                                       | 1.81(1.47;2.23)                  | 14.2(1.8;111.83)              | 9.34x10-30      |
| rs4245713  | 1281                                 | 1227  | 27                                | 23    | 198                              | 283   | 1                             | 10    | A                                                  | 14      | 1(0.56;1.79)                                          | 1.81(1.47;2.23)                  | 12.7(1.59;101.54)             | 9.43x10-32      |
| rs486453   | 1208                                 | 1154  | 100                               | 96    | 194                              | 265   | 5                             | 28    | C                                                  | 28      | 1.04(0.77;1.4)                                        | 1.73(1.4;2.14)                   | 6.86(2.62;17.92)              | 2.42x10-31      |
| rs4949623  | 1202                                 | 1151  | 106                               | 99    | 193                              | 262   | 6                             | 31    | A                                                  | 28      | 1.01(0.75;1.36)                                       | 1.72(1.39;2.13)                  | 6.16(2.55;14.91)              | 3.57x10-29      |
| Chr 2      |                                      |       |                                   |       |                                  |       |                               |       |                                                    |         |                                                       |                                  |                               |                 |
| rs1520399  | 1274                                 | 1217  | 34                                | 33    | 195                              | 277   | 3                             | 16    | T                                                  | 18      | 1.01(0.61;1.66)                                       | 1.79(1.45;2.21)                  | 6.97(2;24.28)                 | 7.78x10-19      |
| rs2043075  | 1273                                 | 1212  | 35                                | 38    | 198                              | 285   | 1                             | 8     | G                                                  | 14      | 1.08(0.66;1.75)                                       | 1.82(1.48;2.25)                  | 9.94(1.22;81.33)              | 1.57x10-15      |
| rs62621191 | 1276                                 | 1216  | 32                                | 34    | 197                              | 284   | 2                             | 9     | C                                                  | 15      | 1.17(0.71;1.95)                                       | 1.82(1.48;2.24)                  | 10.58(1.32;84.99)             | 4.25x10-15      |
| rs6751950  | 1256                                 | 1194  | 52                                | 56    | 195                              | 279   | 4                             | 14    | C                                                  | 20      | 1.07(0.72;1.6)                                        | 1.8(1.46;2.22)                   | 6.82(1.93;24.1)               | 3.67x10-16      |
| rs964582   | 1251                                 | 1194  | 57                                | 56    | 195                              | 273   | 4                             | 20    | A                                                  | 22      | 1.04(0.7;1.53)                                        | 1.78(1.44;2.2)                   | 5.47(1.84;16.23)              | 6.03x10-13      |
| Chr 3      |                                      |       |                                   |       |                                  |       |                               |       |                                                    |         |                                                       |                                  |                               |                 |
| rs1602474  | 1299                                 | 1242  | 9                                 | 8     | 198                              | 282   | 1                             | 11    | G                                                  | 10      | 1.04(0.39;2.77)                                       | 1.8(1.46;2.22)                   | 13.16(1.67;103.53)            | 4.82x10-28      |
| rs2889390  | 1254                                 | 1192  | 54                                | 58    | 195                              | 280   | 4                             | 13    | T                                                  | 21      | 1.03(0.7;1.51)                                        | 1.8(1.46;2.22)                   | 8.1(1.8;36.58)                | 4.81x10-20      |
| Chr 4      |                                      |       |                                   |       |                                  |       |                               |       |                                                    |         |                                                       |                                  |                               |                 |
| rs1439471  | 1198                                 | 1145  | 110                               | 105   | 191                              | 262   | 8                             | 31    | C                                                  | 28      | 1.04(0.78;1.38)                                       | 1.74(1.4;2.15)                   | 4.88(2.21;10.76)              | 2.48x10-17      |
| rs727633   | 1216                                 | 1157  | 92                                | 93    | 192                              | 267   | 7                             | 26    | C                                                  | 26      | 1.17(0.86;1.59)                                       | 1.76(1.42;2.18)                  | 5.35(2.29;12.49)              | 5.38x10-15      |
| Chr 5      |                                      |       |                                   |       |                                  |       |                               |       |                                                    |         |                                                       |                                  |                               |                 |
| rs10039050 | 1296                                 | 1237  | 12                                | 13    | 198                              | 283   | 1                             | 10    | A                                                  | 13      | 1.08(0.48;2.43)                                       | 1.81(1.47;2.23)                  | 13.3(1.68;105.41)             | 8.96x10-28      |
| rs17708750 | 1264                                 | 1210  | 44                                | 40    | 196                              | 274   | 3                             | 19    | C                                                  | 17      | 1.01(0.64;1.57)                                       | 1.77(1.43;2.19)                  | 7.86(2.29;26.96)              | 1.61x10-27      |
| rs2731798  | 1186                                 | 1126  | 122                               | 124   | 191                              | 264   | 7                             | 29    | A                                                  | 29      | 1.06(0.8;1.38)                                        | 1.76(1.42;2.18)                  | 5.15(2.22;11.97)              | 2.49x10-17      |
| rs6881772  | 1296                                 | 1237  | 12                                | 13    | 198                              | 284   | 1                             | 9     | T                                                  | 13      | 1.08(0.48;2.43)                                       | 1.82(1.47;2.24)                  | 12.35(1.54;98.92)             | 3.13x10-23      |
| rs7725668  | 1273                                 | 1213  | 34                                | 37    | 198                              | 286   | 1                             | 7     | T                                                  | 16      | 1.2(0.74;1.96)                                        | 1.83(1.49;2.26)                  | 10.32(1.25;85.36)             | 3.64x10-13      |

|            |      |      |     |     |     |     |   |    |   |    |                 |                 |                    |            |
|------------|------|------|-----|-----|-----|-----|---|----|---|----|-----------------|-----------------|--------------------|------------|
| Chr 6      |      |      |     |     |     |     |   |    |   |    |                 |                 |                    |            |
| rs1474642  | 1272 | 1219 | 36  | 31  | 198 | 283 | 1 | 10 | A | 15 | 1.01(0.61;1.67) | 1.81(1.47;2.23) | 12.57(1.57;100.31) | 6.25x10-31 |
| rs17802893 | 1299 | 1241 | 9   | 9   | 198 | 285 | 1 | 8  | T | 8  | 1.04(0.4;2.71)  | 1.82(1.48;2.24) | 10.64(1.31;86.68)  | 7.27x10-17 |
| rs3094682  | 1279 | 1219 | 29  | 31  | 198 | 282 | 1 | 11 | C | 15 | 1.25(0.74;2.12) | 1.82(1.48;2.24) | 11.77(1.49;93.24)  | 8.64x10-17 |
| Chr 7      |      |      |     |     |     |     |   |    |   |    |                 |                 |                    |            |
| rs5024722  | 1262 | 1204 | 46  | 46  | 194 | 277 | 4 | 16 | A | 20 | 1.1(0.72;1.68)  | 1.8(1.46;2.23)  | 6.49(1.86;22.63)   | 1.26x10-13 |
| rs509834   | 1284 | 1226 | 20  | 21  | 197 | 282 | 1 | 10 | T | 12 | 1.1(0.58;2.08)  | 1.8(1.46;2.22)  | 13.63(1.73;107.75) | 1.29x10-30 |
| Chr 8      |      |      |     |     |     |     |   |    |   |    |                 |                 |                    |            |
| rs10095737 | 1251 | 1190 | 57  | 60  | 195 | 272 | 4 | 21 | G | 21 | 1.11(0.76;1.63) | 1.77(1.43;2.18) | 7.34(2.46;21.93)   | 1.32x10-23 |
| rs10097531 | 1233 | 1179 | 75  | 71  | 192 | 268 | 7 | 25 | C | 24 | 1.03(0.73;1.46) | 1.77(1.43;2.19) | 4.67(1.97;11.09)   | 1.12x10-12 |
| rs10107180 | 1241 | 1186 | 67  | 64  | 194 | 268 | 5 | 25 | C | 23 | 1.02(0.71;1.47) | 1.75(1.42;2.16) | 6.51(2.43;17.44)   | 1.42x10-25 |
| rs10107303 | 1233 | 1180 | 75  | 70  | 192 | 268 | 7 | 25 | C | 24 | 1.01(0.72;1.43) | 1.77(1.43;2.19) | 4.68(1.97;11.11)   | 2.94x10-13 |
| rs167999   | 1258 | 1198 | 48  | 50  | 195 | 273 | 4 | 20 | A | 20 | 1.1(0.73;1.67)  | 1.77(1.44;2.19) | 6.6(2.22;19.65)    | 3.91x10-18 |
| rs2116096  | 1241 | 1185 | 67  | 65  | 194 | 268 | 5 | 25 | G | 22 | 1.03(0.72;1.48) | 1.75(1.42;2.17) | 6.49(2.42;17.38)   | 7.03x10-25 |
| rs28592638 | 1233 | 1180 | 74  | 70  | 191 | 268 | 7 | 25 | C | 24 | 1.03(0.73;1.46) | 1.78(1.43;2.2)  | 4.69(1.98;11.14)   | 9.66x10-13 |
| rs4610751  | 1175 | 1121 | 132 | 127 | 190 | 264 | 8 | 29 | C | 31 | 1(0.77;1.31)    | 1.77(1.42;2.19) | 4.57(1.96;10.63)   | 1.06x10-13 |
| rs6601520  | 1223 | 1168 | 85  | 82  | 192 | 263 | 7 | 30 | T | 25 | 1.05(0.76;1.46) | 1.72(1.39;2.13) | 7(2.85;17.18)      | 1.52x10-35 |
| rs6601524  | 1242 | 1186 | 66  | 64  | 195 | 269 | 4 | 24 | G | 22 | 1.03(0.71;1.49) | 1.75(1.41;2.16) | 8.1(2.74;23.9)     | 1.52x10-37 |
| rs6985218  | 1234 | 1180 | 74  | 70  | 192 | 268 | 7 | 25 | C | 24 | 1.03(0.73;1.46) | 1.77(1.43;2.19) | 4.7(1.98;11.15)    | 6.44x10-13 |
| rs7001206  | 1226 | 1175 | 80  | 74  | 192 | 267 | 6 | 26 | G | 24 | 1.05(0.75;1.47) | 1.76(1.42;2.18) | 5.92(2.38;14.76)   | 2.09x10-21 |
| rs7014168  | 1251 | 1190 | 57  | 60  | 195 | 272 | 4 | 21 | G | 21 | 1.11(0.76;1.63) | 1.77(1.43;2.18) | 7.34(2.46;21.93)   | 1.32x10-23 |
| rs73196893 | 1271 | 1206 | 37  | 44  | 196 | 280 | 3 | 13 | G | 18 | 1.28(0.81;2.01) | 1.81(1.47;2.23) | 9.21(2.03;41.67)   | 1.77x10-16 |
| rs73196895 | 1264 | 1194 | 39  | 44  | 193 | 272 | 3 | 14 | C | 18 | 1.19(0.76;1.86) | 1.8(1.46;2.23)  | 10.11(2.25;45.32)  | 5.92x10-24 |
| rs73198940 | 1296 | 1236 | 12  | 14  | 197 | 284 | 2 | 9  | G | 11 | 1.34(0.61;2.98) | 1.82(1.48;2.24) | 11.63(1.44;93.73)  | 5.55x10-13 |
| rs7823088  | 1241 | 1186 | 67  | 64  | 195 | 269 | 4 | 24 | G | 22 | 1.02(0.7;1.46)  | 1.75(1.41;2.16) | 8.09(2.74;23.89)   | 8.41x10-39 |
| rs891554   | 1232 | 1178 | 76  | 72  | 192 | 267 | 7 | 26 | C | 24 | 1.02(0.73;1.44) | 1.76(1.43;2.18) | 4.82(2.04;11.4)    | 3.07x10-14 |
| rs9644730  | 1233 | 1179 | 75  | 71  | 192 | 268 | 7 | 25 | G | 24 | 1.03(0.73;1.46) | 1.77(1.43;2.19) | 4.67(1.97;11.09)   | 1.12x10-12 |
| Chr 9      |      |      |     |     |     |     |   |    |   |    |                 |                 |                    |            |
| rs12686329 | 1282 | 1221 | 26  | 29  | 198 | 287 | 1 | 6  | C | 13 | 1.11(0.64;1.93) | 1.83(1.49;2.25) | 10.46(1.24;88.1)   | 2.02x10-15 |
| rs2472508  | 1271 | 1216 | 37  | 34  | 196 | 280 | 2 | 13 | G | 18 | 1.04(0.64;1.7)  | 1.81(1.47;2.23) | 8.31(1.83;37.63)   | 1.47x10-19 |
| rs2487049  | 1271 | 1216 | 37  | 34  | 197 | 280 | 2 | 13 | A | 18 | 1.04(0.63;1.7)  | 1.8(1.46;2.22)  | 8.31(1.83;37.64)   | 7.58x10-20 |
| rs7851754  | 1205 | 1152 | 103 | 98  | 190 | 261 | 9 | 32 | G | 28 | 1.05(0.78;1.42) | 1.73(1.39;2.14) | 5.89(2.55;13.62)   | 9.78x10-26 |
| rs930340   | 1245 | 1190 | 63  | 59  | 193 | 274 | 6 | 19 | A | 21 | 1.01(0.69;1.47) | 1.78(1.44;2.2)  | 5.26(1.94;14.25)   | 2.95x10-14 |
| rs9406465  | 1191 | 1128 | 117 | 119 | 189 | 259 | 9 | 34 | A | 31 | 1.11(0.84;1.47) | 1.74(1.4;2.16)  | 5.1(2.41;10.82)    | 2.97x10-18 |
| Chr 10     |      |      |     |     |     |     |   |    |   |    |                 |                 |                    |            |
| rs55749454 | 1278 | 1220 | 30  | 30  | 198 | 283 | 1 | 10 | G | 14 | 1.08(0.64;1.83) | 1.81(1.47;2.23) | 12.94(1.62;103.09) | 1.69x10-28 |
| rs7081222  | 1240 | 1193 | 68  | 57  | 193 | 274 | 6 | 19 | C | 21 | 1(0.69;1.45)    | 1.77(1.44;2.19) | 5.72(2.09;15.66)   | 6.24x10-18 |
| Chr 11     |      |      |     |     |     |     |   |    |   |    |                 |                 |                    |            |
| rs11221388 | 1284 | 1223 | 24  | 27  | 197 | 285 | 2 | 8  | G | 14 | 1.14(0.64;2.02) | 1.83(1.48;2.25) | 10.29(1.27;83.4)   | 1.09x10-14 |
| rs12362809 | 1272 | 1213 | 36  | 37  | 195 | 281 | 4 | 12 | G | 16 | 1.09(0.67;1.76) | 1.81(1.47;2.23) | 7.75(1.7;35.38)    | 4.35x10-15 |
| rs12363819 | 1284 | 1223 | 24  | 27  | 197 | 285 | 2 | 8  | A | 14 | 1.14(0.64;2.02) | 1.83(1.48;2.25) | 10.29(1.27;83.4)   | 1.09x10-14 |
| rs198459   | 1264 | 1205 | 44  | 45  | 196 | 285 | 2 | 8  | G | 19 | 1.11(0.72;1.72) | 1.83(1.49;2.26) | 10.6(1.31;86.05)   | 1.27x10-16 |
| rs61907787 | 1285 | 1226 | 23  | 24  | 197 | 285 | 2 | 8  | G | 14 | 1.09(0.6;1.98)  | 1.82(1.48;2.25) | 10.28(1.27;83.34)  | 5.69x10-16 |



|            |      |      |     |     |     |     |   |    |   |    |                 |                 |                    |            |
|------------|------|------|-----|-----|-----|-----|---|----|---|----|-----------------|-----------------|--------------------|------------|
| rs835839   | 1279 | 1217 | 29  | 33  | 198 | 284 | 1 | 9  | C | 15 | 1.26(0.74;2.13) | 1.83(1.48;2.25) | 11.02(1.38;88.29)  | 2.97x10-14 |
| Chr 12     |      |      |     |     |     |     |   |    |   |    |                 |                 |                    |            |
| rs1463863  | 1262 | 1205 | 46  | 45  | 198 | 282 | 1 | 11 | C | 18 | 1.07(0.69;1.65) | 1.82(1.47;2.24) | 10.95(1.39;85.96)  | 8.26x10-21 |
| rs17466339 | 1278 | 1223 | 29  | 27  | 198 | 286 | 1 | 7  | C | 15 | 1.02(0.59;1.76) | 1.83(1.48;2.25) | 10.11(1.23;83.08)  | 1.05x10-17 |
| Chr 13     |      |      |     |     |     |     |   |    |   |    |                 |                 |                    |            |
| rs11840638 | 1272 | 1211 | 36  | 39  | 196 | 282 | 3 | 11 | C | 16 | 1.21(0.75;1.94) | 1.82(1.47;2.24) | 12.48(1.59;97.66)  | 3.28x10-21 |
| rs1331752  | 1234 | 1182 | 74  | 68  | 196 | 275 | 3 | 18 | A | 23 | 1.04(0.73;1.48) | 1.77(1.43;2.18) | 11.43(2.61;50.03)  | 1.43x10-47 |
| rs2094196  | 1260 | 1200 | 48  | 50  | 196 | 278 | 3 | 15 | T | 19 | 1.1(0.72;1.66)  | 1.79(1.45;2.21) | 9.77(2.21;43.2)    | 9.32x10-28 |
| rs4592537  | 1262 | 1205 | 46  | 45  | 198 | 282 | 1 | 11 | C | 18 | 1.06(0.69;1.63) | 1.81(1.47;2.23) | 12.79(1.62;100.98) | 5.11x10-30 |
| rs500574   | 1241 | 1185 | 67  | 65  | 196 | 277 | 3 | 16 | G | 22 | 1.13(0.79;1.63) | 1.79(1.45;2.21) | 10.26(2.32;45.41)  | 1.95x10-29 |
| rs9525841  | 1272 | 1211 | 36  | 39  | 196 | 282 | 3 | 11 | T | 16 | 1.21(0.75;1.94) | 1.82(1.47;2.24) | 12.48(1.59;97.66)  | 3.28x10-21 |
| rs9533613  | 1272 | 1211 | 36  | 39  | 196 | 282 | 3 | 11 | T | 16 | 1.21(0.75;1.94) | 1.82(1.47;2.24) | 12.48(1.59;97.66)  | 3.28x10-21 |
| Chr 14     |      |      |     |     |     |     |   |    |   |    |                 |                 |                    |            |
| rs10142781 | 1245 | 1190 | 61  | 59  | 193 | 274 | 5 | 19 | C | 20 | 1.06(0.72;1.55) | 1.79(1.44;2.21) | 5.42(2;14.7)       | 9.2x10-14  |
| rs10151371 | 1229 | 1179 | 79  | 71  | 193 | 270 | 6 | 23 | G | 24 | 1.04(0.74;1.47) | 1.78(1.44;2.2)  | 4.92(1.96;12.34)   | 5.87x10-13 |
| rs17124043 | 1248 | 1195 | 60  | 55  | 196 | 279 | 3 | 14 | C | 21 | 1.1(0.75;1.62)  | 1.81(1.46;2.23) | 6.45(1.81;22.92)   | 4.06x10-13 |
| rs17124045 | 1248 | 1195 | 60  | 55  | 196 | 279 | 3 | 14 | A | 21 | 1.1(0.75;1.62)  | 1.81(1.46;2.23) | 6.45(1.81;22.92)   | 4.06x10-13 |
| rs17203608 | 1248 | 1196 | 60  | 54  | 196 | 279 | 3 | 14 | T | 21 | 1.07(0.73;1.58) | 1.8(1.46;2.23)  | 6.44(1.81;22.88)   | 7.70x10-14 |
| rs17798173 | 1248 | 1196 | 60  | 54  | 196 | 279 | 3 | 14 | C | 21 | 1.07(0.73;1.58) | 1.8(1.46;2.23)  | 6.44(1.81;22.88)   | 7.70x10-14 |
| rs17798179 | 1248 | 1196 | 60  | 54  | 196 | 279 | 3 | 14 | C | 21 | 1.07(0.73;1.58) | 1.8(1.46;2.23)  | 6.44(1.81;22.88)   | 7.70x10-14 |
| rs17798191 | 1248 | 1196 | 60  | 54  | 196 | 279 | 3 | 14 | C | 21 | 1.07(0.73;1.58) | 1.8(1.46;2.23)  | 6.44(1.81;22.88)   | 7.70x10-14 |
| rs4303414  | 1248 | 1196 | 60  | 54  | 196 | 279 | 3 | 14 | C | 21 | 1.07(0.73;1.58) | 1.8(1.46;2.23)  | 6.44(1.81;22.88)   | 7.70x10-14 |
| rs4483792  | 1248 | 1196 | 60  | 54  | 196 | 279 | 3 | 14 | T | 21 | 1.07(0.73;1.58) | 1.8(1.46;2.23)  | 6.44(1.81;22.88)   | 7.70x10-14 |
| rs4904423  | 1248 | 1195 | 60  | 55  | 196 | 279 | 3 | 14 | G | 21 | 1.1(0.75;1.62)  | 1.81(1.46;2.23) | 6.45(1.81;22.92)   | 4.06x10-13 |
| rs4904424  | 1248 | 1196 | 60  | 54  | 196 | 279 | 3 | 14 | G | 21 | 1.07(0.73;1.58) | 1.8(1.46;2.23)  | 6.44(1.81;22.88)   | 7.70x10-14 |
| rs59644163 | 1248 | 1196 | 60  | 54  | 196 | 279 | 3 | 14 | A | 21 | 1.07(0.73;1.58) | 1.8(1.46;2.23)  | 6.44(1.81;22.88)   | 7.70x10-14 |
| rs61975760 | 1248 | 1196 | 60  | 54  | 196 | 279 | 3 | 14 | A | 21 | 1.07(0.73;1.58) | 1.8(1.46;2.23)  | 6.44(1.81;22.88)   | 7.70x10-14 |
| rs61975777 | 1248 | 1196 | 60  | 54  | 196 | 279 | 3 | 14 | C | 21 | 1.07(0.73;1.58) | 1.8(1.46;2.23)  | 6.44(1.81;22.88)   | 7.70x10-14 |
| rs61975778 | 1248 | 1196 | 60  | 54  | 196 | 279 | 3 | 14 | C | 21 | 1.07(0.73;1.58) | 1.8(1.46;2.23)  | 6.44(1.81;22.88)   | 7.70x10-14 |
| rs61975779 | 1248 | 1196 | 60  | 54  | 196 | 279 | 3 | 14 | G | 21 | 1.07(0.73;1.58) | 1.8(1.46;2.23)  | 6.44(1.81;22.88)   | 7.70x10-14 |
| rs61975782 | 1248 | 1196 | 60  | 54  | 196 | 279 | 3 | 14 | G | 21 | 1.07(0.73;1.58) | 1.8(1.46;2.23)  | 6.44(1.81;22.88)   | 7.70x10-14 |
| rs61977336 | 1248 | 1196 | 60  | 54  | 196 | 279 | 3 | 14 | C | 21 | 1.07(0.73;1.58) | 1.8(1.46;2.23)  | 6.44(1.81;22.88)   | 7.70x10-14 |
| rs72693891 | 1248 | 1196 | 60  | 54  | 196 | 279 | 3 | 14 | G | 21 | 1.07(0.73;1.58) | 1.8(1.46;2.23)  | 6.44(1.81;22.88)   | 7.70x10-14 |
| Chr 15     |      |      |     |     |     |     |   |    |   |    |                 |                 |                    |            |
| rs11638662 | 1190 | 1138 | 118 | 112 | 191 | 262 | 8 | 31 | C | 29 | 1.06(0.8;1.4)   | 1.73(1.4;2.14)  | 5.79(2.5;13.37)    | 1.83x10-24 |
| rs12439792 | 1291 | 1238 | 17  | 12  | 198 | 287 | 1 | 6  | T | 9  | 1(0.46;2.18)    | 1.83(1.49;2.25) | 9.92(1.16;84.81)   | 5.01x10-16 |
| rs4395027  | 1277 | 1218 | 29  | 27  | 198 | 282 | 1 | 11 | G | 15 | 1.01(0.58;1.73) | 1.8(1.46;2.22)  | 15.31(1.94;120.91) | 3.24x10-49 |
| rs7165170  | 1262 | 1201 | 46  | 49  | 198 | 282 | 1 | 11 | A | 20 | 1.05(0.69;1.61) | 1.8(1.46;2.22)  | 18.14(2.27;144.85) | 3.04x10-66 |
| rs76414746 | 1284 | 1226 | 24  | 24  | 198 | 284 | 1 | 9  | A | 13 | 1.27(0.71;2.29) | 1.82(1.48;2.24) | 14.04(1.75;112.86) | 4.19x10-23 |
| rs922507   | 1258 | 1193 | 50  | 57  | 195 | 275 | 4 | 18 | C | 20 | 1.18(0.79;1.77) | 1.79(1.45;2.21) | 6.16(2.05;18.45)   | 6.01x10-13 |
| Chr 16     |      |      |     |     |     |     |   |    |   |    |                 |                 |                    |            |
| rs2716596  | 1271 | 1210 | 37  | 40  | 198 | 285 | 1 | 8  | G | 17 | 1.16(0.73;1.85) | 1.83(1.49;2.25) | 10.39(1.28;84.41)  | 9.48x10-15 |
| rs34550882 | 1278 | 1222 | 30  | 28  | 198 | 283 | 1 | 10 | C | 14 | 1.06(0.62;1.8)  | 1.82(1.47;2.24) | 10.82(1.35;86.46)  | 8.58x10-20 |

|            |      |      |     |     |     |     |   |    |   |    |                 |                 |                    |            |
|------------|------|------|-----|-----|-----|-----|---|----|---|----|-----------------|-----------------|--------------------|------------|
| rs4787317  | 1288 | 1230 | 20  | 20  | 198 | 283 | 1 | 10 | G | 13 | 1.06(0.56;2.01) | 1.81(1.47;2.24) | 11.19(1.39;89.79)  | 1.06x10-20 |
| rs8059494  | 1289 | 1230 | 18  | 20  | 198 | 285 | 1 | 8  | T | 12 | 1.29(0.66;2.53) | 1.82(1.48;2.25) | 10.95(1.35;88.73)  | 9.21x10-13 |
| Chr 17     |      |      |     |     |     |     |   |    |   |    |                 |                 |                    |            |
| rs4793460  | 1292 | 1232 | 16  | 18  | 198 | 285 | 1 | 8  | T | 12 | 1.32(0.65;2.67) | 1.82(1.48;2.25) | 11.5(1.42;93.38)   | 2.15x10-13 |
| rs60399446 | 1288 | 1226 | 20  | 23  | 197 | 285 | 1 | 8  | G | 13 | 1.15(0.61;2.16) | 1.84(1.49;2.26) | 10.3(1.26;84)      | 6.54x10-14 |
| Chr 19     |      |      |     |     |     |     |   |    |   |    |                 |                 |                    |            |
| rs10417472 | 1280 | 1221 | 28  | 29  | 198 | 286 | 1 | 7  | T | 14 | 1.06(0.61;1.84) | 1.83(1.48;2.25) | 10.08(1.21;83.76)  | 4.41x10-16 |
| rs1041992  | 1173 | 1108 | 135 | 142 | 190 | 252 | 9 | 41 | T | 5  | 1.09(0.84;1.41) | 1.69(1.36;2.1)  | 5.79(2.77;12.1)    | 6.66x10-30 |
| rs2665586  | 1279 | 1221 | 29  | 29  | 198 | 286 | 1 | 7  | G | 14 | 1.03(0.6;1.79)  | 1.83(1.48;2.25) | 10.07(1.21;83.72)  | 6.06x10-17 |
| rs6510126  | 1263 | 1198 | 45  | 52  | 197 | 279 | 2 | 14 | C | 19 | 1.18(0.77;1.79) | 1.81(1.47;2.23) | 8.42(1.87;38.01)   | 5.23x10-16 |
| rs73064150 | 1279 | 1219 | 29  | 31  | 198 | 283 | 1 | 10 | A | 17 | 1.15(0.68;1.96) | 1.81(1.47;2.23) | 13.04(1.64;103.53) | 4.11x10-25 |
| Chr 20     |      |      |     |     |     |     |   |    |   |    |                 |                 |                    |            |
| rs182390   | 1221 | 1143 | 87  | 107 | 191 | 264 | 8 | 29 | C | 28 | 1.29(0.95;1.75) | 1.77(1.43;2.19) | 5.62(2.42;13.06)   | 3.78x10-14 |
| rs6044009  | 1269 | 1215 | 39  | 35  | 198 | 286 | 1 | 7  | G | 17 | 1.14(0.7;1.84)  | 1.83(1.49;2.26) | 10.2(1.24;83.81)   | 1.80x10-14 |
| rs6130615  | 1287 | 1229 | 21  | 21  | 198 | 286 | 1 | 7  | C | 13 | 1.03(0.55;1.93) | 1.83(1.48;2.25) | 9.89(1.19;82.29)   | 6.44x10-16 |
| Chr 22     |      |      |     |     |     |     |   |    |   |    |                 |                 |                    |            |
| rs5756557  | 1247 | 1193 | 61  | 57  | 195 | 279 | 4 | 14 | C | 22 | 1.04(0.71;1.51) | 1.8(1.46;2.22)  | 6.63(1.87;23.42)   | 2.41x10-16 |
| rs6000602  | 1250 | 1194 | 56  | 55  | 195 | 278 | 4 | 14 | C | 21 | 1.1(0.74;1.62)  | 1.79(1.45;2.21) | 6.63(1.87;23.42)   | 1.57x10-14 |
| rs6000609  | 1247 | 1192 | 61  | 58  | 195 | 279 | 4 | 14 | T | 21 | 1.03(0.71;1.51) | 1.8(1.46;2.22)  | 6.63(1.87;23.42)   | 2.29x10-16 |

MAF: minor allele frequency

\* Synergy index results were considered significant at p-values <2.4x10-7

† Individuals who carry either one or two copies of the risk allele are considered to carry the risk variant

‡ Results from observations where the number of subjects in any subgroup is 0 are not shown (n=20)

|| Model adjusted for sex, age, education (categorical), physical activity (categorical), Mediterranean diet score and population structure (MDS1-3 continuous)

Supplemental Table VI: Genes in proximity to the genetic variants included in the significant gene-smoking interactions from analyses limited to data where at least one subgroup includes less than 10 individuals.

|                                                                           | Position    | Function                      | Gene in proximity to the genetic variant |
|---------------------------------------------------------------------------|-------------|-------------------------------|------------------------------------------|
| <b>C-IMT<sub>max</sub> with cut-off at the 75<sup>th</sup> percentile</b> |             |                               |                                          |
| Chr 1                                                                     |             |                               |                                          |
| rs11208756                                                                | 65803628    | Intron variant                | <i>PDE4B</i>                             |
| rs11578418                                                                | 151820508   | Intron variant                | <i>RORC</i>                              |
| rs11804222                                                                | 11876457    | Intergenic variant            | <i>None</i>                              |
| rs17371694                                                                | 61843890    | Intron variant                | <i>PATJ</i>                              |
| rs17602729                                                                | 114693436   | Stop gained                   | <i>AMPD1</i>                             |
| rs76000797                                                                | 230273106   | Intron variant                | <i>GALNT2</i>                            |
| Chr 2                                                                     |             |                               |                                          |
| rs113407226                                                               | 27263266    | Intron variant                | <i>SLC30A3</i>                           |
| rs1598279                                                                 | 134473632   | Intron variant                | <i>TMEM163</i>                           |
| rs17594260                                                                | 33476565    | Non-coding transcript variant | <i>RASGRP3</i>                           |
| rs2300963                                                                 | 206569780   | Intron variant                | <i>ADAM23</i>                            |
| Chr 3                                                                     |             |                               |                                          |
| rs10433607                                                                | 46131216    | Non-coding transcript variant | <i>LOC105377067</i>                      |
| rs13320534                                                                | 46130208    | Upstream variant              | <i>LOC105377067</i>                      |
| rs1497891                                                                 | 180464236   | Intergenic variant            | <i>None</i>                              |
| rs16849578                                                                | 180464236   | Intergenic variant            | <i>None</i>                              |
| rs2133007                                                                 | 180512734   | Intron variant                | <i>LOC101928856</i>                      |
| rs904241                                                                  | 180546955   | Intron variant                | <i>LOC101928856</i>                      |
| rs2713621                                                                 | 3:129505288 | Intron variant                | <i>IFT122</i>                            |
| rs9845228                                                                 | 7801970     | Intergenic variant            | <i>None</i>                              |
| Chr 5                                                                     |             |                               |                                          |
| rs10043169                                                                | 160406190   | Intron variant                | <i>SLU7</i>                              |
| rs10512634                                                                | 35987449    | Intron variant                | <i>UGT3A1</i>                            |
| rs10515808                                                                | 160393924   | Missense variant              | <i>ZBED8</i>                             |
| rs12522290                                                                | 153418096   | Intergenic variant            | <i>None</i>                              |
| rs1347118                                                                 | 156035250   | Intron variant                | <i>SGCD</i>                              |
| rs295044                                                                  | 106864274   | Intergenic variant            | <i>LINC01950</i>                         |
| rs400196                                                                  | 25717398    | Intergenic variant            | <i>None</i>                              |
| rs4438916                                                                 | 160400918   | Intron variant                | <i>ZBED8</i>                             |
| rs72814378                                                                | 160397311   | Intron variant                | <i>ZBED8</i>                             |
| rs79791419                                                                | 160414486   | Intron variant                | <i>SLU7</i>                              |
| Chr 6                                                                     |             |                               |                                          |
| rs111663960                                                               | 26081992    | Intergenic variant            | <i>None</i>                              |
| rs113600760                                                               | 50986966    | Intergenic variant            | <i>None</i>                              |

|            |           |                                               |                               |
|------------|-----------|-----------------------------------------------|-------------------------------|
| rs12199718 | 169859976 | Intergenic variant                            | <i>None</i>                   |
| rs1266071  | 31701719  | Intron variant; upstream variant              | <i>ABHD16A; MIR4646</i>       |
| rs190761   | 51011974  | Intergenic variant                            | <i>None</i>                   |
| rs512685   | 149471889 | Intron variant                                | <i>ZC3H12D</i>                |
| rs557411   | 50998902  | Intergenic variant                            | <i>None</i>                   |
| rs576899   | 50985929  | Intergenic variant                            | <i>None</i>                   |
| rs579544   | 50985602  | Intergenic variant                            | <i>None</i>                   |
| rs6940832  | 51012532  | Intergenic variant                            | <i>None</i>                   |
| rs707974   | 31661722  | 3 Prime UTR* variant; upstream variant        | <i>GPANK1; BAG6; C6orf47</i>  |
| rs72832602 | 25978174  | Intron variant, downstream transcript variant | <i>TRIM38</i>                 |
| rs72834621 | 26004795  | Intergenic variant                            | <i>None</i>                   |
| rs72834627 | 26019183  | Upstream variant                              | <i>H1-1. H3C1</i>             |
| rs72834643 | :26041758 | Intergenic variant                            | <i>None</i>                   |
| rs72834647 | 26043165  | Downstream variant                            | <i>H2BC3</i>                  |
| rs7766267  | 25990246  | Intron variant                                | <i>TRIM38</i>                 |
| rs78227802 | 50995403  | Intergenic variant                            | <i>None</i>                   |
| rs9477109  | 16387177  | Intron variant                                | <i>ATXN1</i>                  |
| rs9482260  | 122606981 | Intron variant                                | <i>PKIB</i>                   |
| rs9487678  | 111598059 | Non-coding transcript variant;intron variant  | <i>TRAF3IP2-AS1; TRAF3IP2</i> |
| Chr 7      |           |                                               |                               |
| rs10256347 | 116243531 | Intron variant                                | <i>TES</i>                    |
| rs16868830 | 95585346  | Prime UTR*variant                             | <i>PDK4</i>                   |
| rs2191886  | 31401276  | Intergenic variant                            | <i>None</i>                   |
| rs2271032  | 69359109  | Intergenic variant                            | <i>None</i>                   |
| Chr 8      |           |                                               |                               |
| rs10091991 | 9402217   | Intergenic variant                            | <i>LOC105379231</i>           |
| rs17778118 | 134660104 | Intron variant                                | <i>ZFAT</i>                   |
| Chr 9      |           |                                               |                               |
| rs12380395 | 17877300  | Intergenic variant                            | <i>None</i>                   |
| Chr 10     |           |                                               |                               |
| rs10905959 | 11458048  | Intergenic variant                            | <i>None</i>                   |
| rs10887807 | 88344239  | Intron variant                                | <i>RNLS; LOC101929727</i>     |
| rs11202726 | 88343172  | Intron variant                                | <i>RNLS; LOC101929727</i>     |
| rs11598623 | 88342668  | Intron variant                                | <i>RNLS; LOC101929727</i>     |
| rs12356363 | 20159357  | Intron variant                                | <i>PLXDC2</i>                 |
| rs12411339 | 121308291 | Intron variant                                | <i>LOC105378523</i>           |
| rs1571026  | 6093062   | Intron variant                                | <i>RBM17</i>                  |
| rs2274356  | 6113913   | Intron variant                                | <i>RBM17</i>                  |
| rs4457667  | 118466441 | Intergenic variant                            | <i>None</i>                   |
| rs74149704 | 88342862  | Intron variant                                | <i>RNLS; LOC101929727</i>     |
| rs963244   | 66555465  | Downstream transcript variant, intron variant | <i>CTNNA3</i>                 |
| Chr 11     |           |                                               |                               |
| rs10082672 | 1635752   | Intergenic variant                            | <i>None</i>                   |

|            |           |                                         |                           |
|------------|-----------|-----------------------------------------|---------------------------|
| rs10082701 | 1635752   | Intergenic variant                      | <i>None</i>               |
| rs11214260 | 112589295 | Intergenic variant                      | <i>None</i>               |
| rs11232958 | 71280639  | Intergenic variant                      | <i>None</i>               |
| rs11232966 | 71282505  | Intergenic variant                      | <i>None</i>               |
| rs11246161 | 441140    | Intron variant; 500B downstream variant | <i>ANO9; LOC105376506</i> |
| rs11820515 | 71274752  | Intergenic variant                      | <i>None</i>               |
| rs11827684 | 71274571  | Intergenic variant                      | <i>None</i>               |
| rs11827708 | 71274677  | Intergenic variant                      | <i>None</i>               |
| rs2919706  | 71271759  | Intergenic variant                      | <i>None</i>               |
| rs2919707  | 71271796  | Intergenic variant                      | <i>None</i>               |
| rs2919708  | 71271932  | Intergenic variant                      | <i>None</i>               |
| rs2919710  | 71272305  | Intergenic variant                      | <i>None</i>               |
| rs2919713  | 71274499  | Intergenic variant                      | <i>None</i>               |
| rs2919718  | 71278894  | Intergenic variant                      | <i>None</i>               |
| rs3020039  | 71272077  | Intergenic variant                      | <i>None</i>               |
| rs3020044  | 71274371  | Intergenic variant                      | <i>None</i>               |
| rs4284411  | 71275850  | Intergenic variant                      | <i>None</i>               |
| rs963167   | 9090011   | Intron variant; downstream variant      | <i>SCUBE2; MIR5691</i>    |
| Chr 12     |           |                                         |                           |
| rs1040213  | 76148815  | Intergenic variant                      | <i>None</i>               |
| rs10505859 | 20263760  | Intergenic variant                      | <i>None</i>               |
| rs10851044 | 118878894 | Intron variant                          | <i>LOC105370019</i>       |
| rs12371260 | 118884736 | Intron variant                          | <i>LOC105370019</i>       |
| rs11169949 | 51892962  | Intergenic variant                      | <i>None</i>               |
| rs1468624  | 564688    | Intron variant                          | <i>NINJ2</i>              |
| rs1718302  | 102878908 | Intron variant                          | <i>PAH</i>                |
| rs632151   | 49895440  | Intron variant                          | <i>FAIM2</i>              |
| Chr 13     |           |                                         |                           |
| rs4771411  | 101961195 | Intron variant                          | <i>FGF14</i>              |
| Chr 14     |           |                                         |                           |
| rs709932   | 94382864  | Missense variant                        | <i>SERPINA1</i>           |
| Chr 15     |           |                                         |                           |
| rs12899456 | 75072408  | Intergenic variant                      | <i>None</i>               |
| rs12905302 | 75103493  | Intergenic variant                      | <i>None</i>               |
| rs12899074 | 50649787  | Intron variant                          | <i>TRPM7</i>              |
| rs12899581 | 50628649  | Intron variant                          | <i>TRPM7</i>              |
| rs12906675 | 50646137  | Intron variant                          | <i>TRPM7</i>              |
| rs12907202 | 50639226  | Intron variant                          | <i>TRPM7</i>              |
| rs12907472 | 50647806  | Intron variant                          | <i>TRPM7</i>              |
| rs12907922 | 50633900  | Intron variant                          | <i>TRPM7</i>              |
| rs12916113 | 50661819  | Intron variant                          | <i>TRPM7</i>              |
| rs12916122 | 50682650  | Intron variant                          | <i>TRPM7</i>              |
| rs531366   | 50576582  | Intron variant                          | <i>TRPM7</i>              |

|                                                                           |          |                                             |                        |
|---------------------------------------------------------------------------|----------|---------------------------------------------|------------------------|
| rs540257                                                                  | 50595978 | Intron variant                              | <i>TRPM7</i>           |
| rs600724                                                                  | 50622623 | Intron variant                              | <i>TRPM7</i>           |
| rs615835                                                                  | 50604141 | Intron variant                              | <i>TRPM7</i>           |
| rs623722                                                                  | 50620154 | Intron variant                              | <i>TRPM7</i>           |
| rs2928138                                                                 | 50605915 | Intron variant                              | <i>TRPM7</i>           |
| rs7173321                                                                 | 50630403 | Intron variant                              | <i>TRPM7</i>           |
| rs687549                                                                  | 50576828 | Intron variant                              | <i>TRPM7</i>           |
| rs16968518                                                                | 39239539 | Intergenic variant                          | <i>None</i>            |
| rs181447504                                                               | 75087334 | Intergenic variant                          | <i>None</i>            |
| rs34073905                                                                | 75123784 | Intergenic variant                          | <i>None</i>            |
| rs34359839                                                                | 74982328 | Intergenic variant                          | <i>None</i>            |
| rs35396991                                                                | 75078284 | Intergenic variant                          | <i>None</i>            |
| rs6495133                                                                 | 74963117 | Intron variant                              | <i>LOC107984731</i>    |
| rs71401605                                                                | 74960708 | Intergenic variant                          | <i>None</i>            |
| rs71401676                                                                | 75098000 | Intergenic variant                          | <i>None</i>            |
| rs75969957                                                                | 74977570 | Intergenic variant                          | <i>None</i>            |
| rs8033883                                                                 | 74965147 | Upstream variant                            | <i>LOC107984731</i>    |
| rs8038911                                                                 | 75092427 | Intergenic variant                          | <i>None</i>            |
| Chr 16                                                                    |          |                                             |                        |
| rs12596139                                                                | 54128472 | Intergenic variant                          | <i>None</i>            |
| rs12933423                                                                | 4037511  | Coding sequence variant, synonymous variant | <i>ADCY9</i>           |
| rs16973748                                                                | 86796209 | Intergenic variant                          | <i>None</i>            |
| rs1805007                                                                 | 89919709 | Missense variant                            | <i>MC1R</i>            |
| rs1863985                                                                 | 58590190 | Intergenic variant                          | <i>CNOT1</i>           |
| rs7203264                                                                 | 69091066 |                                             | <i>None</i>            |
| Chr 18                                                                    |          |                                             |                        |
| rs112812977                                                               | 12862914 | Intron variant                              | <i>PTPN2</i>           |
| rs12607452                                                                | 45348204 | Intron variant                              | <i>SLC14A2</i>         |
| rs16978345                                                                | 45345030 | Intron variant                              | <i>SLC14A2</i>         |
| rs4605263                                                                 | 69259177 | Intergenic variant                          | <i>None</i>            |
| rs8097973                                                                 | 59398950 |                                             | <i>LOC107985156</i>    |
| Chr 20                                                                    |          |                                             |                        |
| rs17092385                                                                | 35151451 | Intron variant                              | <i>MMP24-AS1-EDEM2</i> |
| rs73139727                                                                | 63709681 | Intron variant; upstream variant            | <i>ZGPAT. ARFRP1</i>   |
| Chr 21                                                                    |          |                                             |                        |
| rs2835673                                                                 | 37209209 | Intron variant                              | <i>DSCR9</i>           |
| Chr 22                                                                    |          |                                             |                        |
| rs12170612                                                                | 37236140 | Intron variant                              | <i>RAC2</i>            |
| rs9607434                                                                 | 37240909 | Intron variant                              | <i>RAC2</i>            |
| <b>C-IMT<sub>max</sub> with cut-off at the 50<sup>th</sup> percentile</b> |          |                                             |                        |
| Chr 1                                                                     |          |                                             |                        |
| rs10889363                                                                | 62728338 | Intergenic variant                          | <i>None</i>            |

|            |           |                                                  |                                |
|------------|-----------|--------------------------------------------------|--------------------------------|
| rs11208008 | 62725123  | Intergenic variant                               | <i>None</i>                    |
| rs11208010 | 62737550  | Intergenic variant                               | <i>None</i>                    |
| rs12130333 | 62726106  | Intergenic variant                               | <i>None</i>                    |
| rs12566784 | 214955060 | Intergenic variant                               | <i>None</i>                    |
| rs1336474  | 65225566  | Intron variant                                   | <i>AK4</i>                     |
| rs16840422 | 196683704 | Intron variant                                   | <i>CFH</i>                     |
| rs2818765  | 216995141 | Intron variant                                   | <i>ESRRG</i>                   |
| rs3766404  | 196682702 | Intron variant                                   | <i>CFH</i>                     |
| rs4245713  | 202809133 | Prime UTR <sup>a</sup> variant; upstream variant | <i>KDM5B; PCAT6</i>            |
| rs486453   | 76146148  | Intron variant                                   | <i>ST6GALNAC3</i>              |
| rs4949623  | 76152308  | Intron variant                                   | <i>ST6GALNAC3</i>              |
| Chr 2      |           |                                                  |                                |
| rs1520399  | 176398745 | Intergenic variant                               | <i>None</i>                    |
| rs2043075  | 7442631   | Intron variant                                   | <i>LOC100506274</i>            |
| rs62621191 | 240557353 | Splice acceptor variant; 2KB upstream variant    | <i>ANKMY1; DUSP28</i>          |
| rs6751950  | 70333807  | Intergenic variant                               | <i>None</i>                    |
| rs964582   | 100751914 | Intergenic variant                               | <i>None</i>                    |
| Chr 3      |           |                                                  |                                |
| rs1602474  | 163772877 | Intergenic variant                               | <i>None</i>                    |
| rs2889390  | 160991223 | Intron variant                                   | <i>PPM1L</i>                   |
| Chr 4      |           |                                                  |                                |
| rs1439471  | 41708560  | Intergenic variant                               | <i>None</i>                    |
| rs727633   | 21918920  | Intron variant                                   | <i>KCNIP4</i>                  |
| Chr 5      |           |                                                  |                                |
| rs10039050 | 150339295 | Intron variant                                   | <i>LOC105378225</i>            |
| rs17708750 | 174085431 | Intron variant and non-coding transcript         | <i>NSG2 -LOC102724551</i>      |
| rs2731798  | 17095241  | Intergenic variant                               | <i>None</i>                    |
| rs6881772  | 150341244 | Upstream variant                                 | <i>LOC105378225</i>            |
| rs7725668  | 126663642 | Intron variant                                   | <i>LOC105379162</i>            |
| Chr 6      |           |                                                  |                                |
| rs1474642  | 170543473 | Intron variant                                   | <i>PSMB1</i>                   |
| rs17802893 | 12716327  | Upstream variant; intron variant                 | <i>PHACTR1, LOC107984015</i>   |
| rs3094682  | 31296684  | Intron variant                                   | <i>LINC02571, LOC112267902</i> |
| Chr 7      |           |                                                  |                                |
| rs5024722  | 142158888 | Intron variant                                   | <i>MGAM2</i>                   |
| rs509834   | 71673017  | Intron variant                                   | <i>GALNT17</i>                 |
| Chr 8      |           |                                                  |                                |
| rs10095737 | 10783642  | Intron variant                                   | <i>PINX1</i>                   |
| rs10097531 | 10801382  | Intron variant                                   | <i>PINX1</i>                   |
| rs10107180 | 10791576  | Intron variant                                   | <i>PINX1</i>                   |
| rs10107303 | 10791682  | Intron variant                                   | <i>PINX1</i>                   |
| rs2116096  | 10778377  | Intron variant                                   | <i>PINX1</i>                   |
| rs28592638 | 10797063  | Intron variant                                   | <i>PINX1</i>                   |

|            |           |                                       |                                   |
|------------|-----------|---------------------------------------|-----------------------------------|
| rs6601520  | 10771198  | Intron variant                        | <i>PINX1</i>                      |
| rs6601524  | 10777712  | Intron variant                        | <i>PINX1</i>                      |
| rs6985218  | 10797906  | Intron variant                        | <i>PINX1</i>                      |
| rs7014168  | 10784455  | Intron variant                        | <i>PINX1</i>                      |
| rs7823088  | 10781532  | Intron variant                        | <i>PINX1</i>                      |
| rs891554   | 10793270  | Intron variant                        | <i>PINX1</i>                      |
| rs9644730  | 10795981  | Intron variant                        | <i>PINX1</i>                      |
| rs167999   | 55880126  | Intron variant                        | <i>LYN</i>                        |
| rs4610751  | 9594578   | Intron variant                        | <i>TNKS</i>                       |
| rs7001206  | 10734019  | Intron variant                        | <i>LOC102723313</i>               |
| rs73196893 | 11023727  | Intron variant                        | <i>XKR6</i> , <i>LOC112268405</i> |
| rs73196895 | 11027222  | Intron variant                        | <i>XKR6</i>                       |
| rs73198940 | 11134055  | Intron variant                        | <i>XKR6</i>                       |
| Chr 9      |           |                                       |                                   |
| rs12686329 | 110193988 | Intron variant                        | <i>None</i>                       |
| rs2472508  | 104921972 | Intron variant                        | <i>ABCA1</i>                      |
| rs2487049  | 104922005 | Intron variant                        | <i>ABCA1</i>                      |
| rs7851754  | 108613871 | Intergenic variant                    | <i>None</i>                       |
| rs930340   | 84048599  | Intergenic variant                    | <i>None</i>                       |
| rs9406465  | 1386357   | Intron variant                        | <i>LOC102723803</i>               |
| Chr 10     |           |                                       |                                   |
| rs55749454 | 88339382  | Intron variant                        | <i>RNLS</i> , <i>LOC101929727</i> |
| rs7081222  | 9879580   | Upstream variant                      | <i>LINC02663</i>                  |
| Chr 11     |           |                                       |                                   |
| rs11221388 | 128605106 | Intergenic variant                    | <i>LOC105369568</i>               |
| rs12362809 | 114475848 | Intergenic variant                    | <i>NXPE2</i>                      |
| rs12363819 | 128608431 | Intergenic variant                    | <i>LOC105369568</i>               |
| rs198459   | 61757548  | Non-coding transcript; intron variant | <i>MYRF-AS1</i> ; <i>MYRF</i>     |
| rs61907787 | 128610401 | Non-coding transcript                 | <i>LOC105369568</i>               |
| rs835839   | 44880352  | Intron variant                        | <i>TSPAN18</i>                    |
| Chr 12     |           |                                       |                                   |
| rs1463863  | 118745833 | Intergenic variant                    | <i>None</i>                       |
| rs17466339 | 40318557  | Intron variant                        | <i>LRRK2</i>                      |
| Chr 13     |           |                                       |                                   |
| rs11840638 | 43774384  | Intron variant                        | <i>ENOX1</i>                      |
| rs1331752  | 57248074  | Intergenic variant                    | <i>None</i>                       |
| rs2094196  | 47939422  | Intergenic variant                    | <i>None</i>                       |
| rs4592537  | 62001158  | Intergenic variant                    | <i>None</i>                       |
| rs500574   | 57226507  | Intergenic variant                    | <i>None</i>                       |
| rs9525841  | 43772927  | Intergenic variant                    | <i>ENOX1</i>                      |
| rs9533613  | 43773493  | Intergenic variant                    | <i>ENOX1</i>                      |
| Chr 14     |           |                                       |                                   |
| rs10142781 | 46837078  | 3 prime UTR <sup>a</sup> variant      | <i>MDGA2</i>                      |



|            |          |                                      |                                   |
|------------|----------|--------------------------------------|-----------------------------------|
| rs10151371 | 88028231 | Intron variant; 2KB upstream variant | <i>LINC01146; LINC01147</i>       |
| rs17124043 | 88084433 | Intron variant                       | <i>LINC01146</i>                  |
| rs17124045 | 88084580 | Intron variant                       | <i>LINC01146</i>                  |
| rs17203608 | 88080126 | Intron variant                       | <i>LINC01146</i>                  |
| rs17798173 | 88077653 | Intron variant                       | <i>LINC01146</i>                  |
| rs17798179 | 88078202 | Intron variant                       | <i>LINC01146</i>                  |
| rs17798191 | 88089912 | Intergenic variant                   | <i>None</i>                       |
| rs4303414  | 88062456 | Intron variant                       | <i>LINC01146</i>                  |
| rs4483792  | 88062707 | Intron variant                       | <i>LINC01146</i>                  |
| rs4904423  | 88084632 | Intron variant                       | <i>LINC01146</i>                  |
| rs4904424  | 88085048 | Intron variant                       | <i>LINC01146</i>                  |
| rs59644163 | 88079131 | Intron variant                       | <i>LINC01146</i>                  |
| rs61975760 | 88062229 | Intron variant                       | <i>LINC01146</i>                  |
| rs61975777 | 88066797 | Intron variant                       | <i>LINC01146</i>                  |
| rs61975778 | 88069792 | Intron variant                       | <i>LINC01146</i>                  |
| rs61975779 | 88069792 | Intron variant                       | <i>LINC01146</i>                  |
| rs61975782 | 88080381 | Intron variant                       | <i>LINC01146</i>                  |
| rs61977336 | 88050993 | Intron variant                       | <i>LINC01146</i>                  |
| rs72693891 | 88087009 | Non-coding transcript variant        | <i>LINC01146</i>                  |
| Chr 15     |          |                                      |                                   |
| rs11638662 | 40254473 | Intron variant; 2KB upstream variant | <i>BUB1B-PAK6; PAK6; PAK6-AS1</i> |
| rs12439792 | 67145047 | Intron variant                       | <i>SMAD3</i>                      |
| rs4395027  | 93110051 | Intron variant                       | <i>LOC101927025</i>               |
| rs7165170  | 90638257 | Intron variant                       | <i>CRTC3; CRTC3-AS1</i>           |
| rs76414746 | 63076515 | Intergenic variant                   | <i>None</i>                       |
| rs922507   | 94663407 | Intergenic variant                   | <i>None</i>                       |
| Chr 16     |          |                                      |                                   |
| rs2716596  | 74045220 | Intergenic variant                   | <i>None</i>                       |
| rs34550882 | 31263554 | Intron variant                       | <i>ITGAM</i>                      |
| rs4787317  | 25341946 | Intergenic variant                   | <i>None</i>                       |
| rs8059494  | 25243921 | Missense variant                     | <i>ZKSCAN2</i>                    |
| Chr 17     |          |                                      |                                   |
| rs4793460  | 72622702 | Intron variant                       | <i>LINC00511; LOC107985006</i>    |
| rs60399446 | 42756585 | Intron variant                       | <i>RAMP2-AS1</i>                  |
| Chr 19     |          |                                      |                                   |
| rs10417472 | 48594630 | Intron variant                       | <i>SULT2B1</i>                    |
| rs1041992  | 41625899 | Synonymous variant                   | <i>CEACAM4</i>                    |
| rs2665586  | 48596124 | Intron variant                       | <i>SULT2B1</i>                    |
| rs6510126  | 58164549 | Intergenic variant                   | <i>None</i>                       |
| rs73064150 | 54482485 | Intergenic variant                   | <i>None</i>                       |
| Chr 20     |          |                                      |                                   |
| rs182390   | 39683827 | Intergenic variant                   | <i>None</i>                       |
| rs6044009  | 16485758 | Intron variant                       | <i>KIF16B</i>                     |

|           |          |                     |               |
|-----------|----------|---------------------|---------------|
| rs6130615 | 44430797 | 3 Prime UTR*variant | <i>HNF4A</i>  |
| chr 22    |          |                     |               |
| rs5756557 | 37209757 | Intron variant      | <i>SSTR3</i>  |
| rs6000609 | 37213302 | Intron variant      | <i>SSTR3</i>  |
| rs6000602 | 37194509 | Intron variant      | <i>C1QTNF</i> |

---

\* UTR: untranslated region

### **Members of the IMPROVE study group**

Eriksson P: Cardiovascular Medicine Unit, Department of Medicine Solna, Karolinska Institutet, Stockholm, Sweden

Amato M, Bonomi A, Coggi D, Frigerio B, Ravani A Sansaro D and Tedesco C: Centro Cardiologico Monzino, IRCCS, Milan, Italy

Acharya J and Cooper J: Cardiovascular Genetics, Institute Cardiovascular Science, University College London, United Kingdom

Huttunen K, Penttila IM, Rauramaa E and Törrönen J: Foundation for Research in Health Exercise and Nutrition, Kuopio & Research Institute of Exercise Medicine, Kuopio, Finland & Department of Clinical Physiology and Nuclear Medicine, Kuopio University Hospital, Kuopio, Finland

Karppi J, Kauhanen J, Nurmi T, Nyssönen K, Tuomainen J and Tuomainen TP: Institute of Public Health and Clinical Nutrition, University of Eastern Finland, Kuopio, Finland

Bianconi D, Lupattelli G, Mannarino MR, Siepi D and Vaudo G: Unit of Internal Medicine, Angiology and Arteriosclerosis Diseases, Department of Medicine, University of Perugia, Perugia, Italy

Mulder DJ, Nicolai A, Smeets GH, van Gessel AI and van Roon AM: Department of Medicine, University Medical Center Groningen, Groningen, The Netherlands.

Carrie A, Gallo A and Kontush A: Unités de Prévention Cardiovasculaire, Assistance Publique-Hôpitaux de Paris, Service Endocrinologie-Métabolisme, Groupe Hospitalier Pitié-Salpêtrière, Paris, France

Calabresi L and Sirtori CR: Department of Pharmacological and Biomolecular Sciences, University of Milan, Milan, Italy.
